# Supplementary material for: A Microbial Cell Factory Combining an Artificial Metathase with a Fatty Acid Decarboxylase for New-to-Nature Synthesis of Cycloalkenes
Source: Research Square preprint supplement (doi:10.21203/rs.3.rs-3706252/v1), 2023-12-13
Supplement: Supplementary file 1 [file 64050b135460b8b3a81582cf.docx]

**A Microbial Cell Factory Combining an Artificial Metathase with a Fatty Acid Decarboxylase for New-to-Nature Synthesis of Cycloalkenes**

**Zhi Zou1, 2, Shuke Wu1, §, Daniel Gerngross3, Boris Lozhkin1, Dongping Chen1, Ryo Tachibana1, §, Thomas R Ward*1, 2**

1 Department of Chemistry, University of Basel, BPR 1096, Mattenstrasse 24a, 4058 Basel, Switzerland.

2 National Center of Competence in Research “Molecular Systems Engineering”, Basel, Switzerland.

3 Laboratory Automation Facility, D-BSSE, ETH Zürich, Schanzenstrasse 44, 4056 Basel, Switzerland.

§ Current address: National Key Laboratory of Agricultural Microbiology, College of Life Science and Technology, Huazhong Agricultural University, No.1 Shizishan Street, 430070, Wuhan, China.

§ Current address: Laboratory of Chemistry and Biology, Graduate School of Pharmaceutical Sciences, The University of Tokyo, 7-3-1 Hongo, Bunkyo-ku, Tokyo 113-0033, Japan.

*E-mail: thomas.ward@unibas.ch

**Table of Contents**

[Section 1: Supplementary Methods 4](#_Toc151472817)

[Chemicals and Materials 4](#_Toc151472818)

[Gas Chromatography-Mass Spectrometry (GC-MS) analysis 4](#_Toc151472819)

[Quantification of the surface-displayed hCAII WT (hCAIICSD WT) 5](#_Toc151472820)

[Determination of the binding affinity (KD) of hCAII for Ru1 5](#_Toc151472821)

[Optimization of Ru1 loading and incubation temperature for the production of Cy6 5](#_Toc151472822)

[Directed evolution of the cell surface-displayed artificial metathase (Ru1·hCAIICSD) 6](#_Toc151472823)

[Cytoplasmic expression of the hCAII variants and in vitro RCM in the production of cycloalkenes 7](#_Toc151472824)

[Directed evolution of the UndB decarboxylase 8](#_Toc151472825)

[Flask expression and activity validation of the evolved UndB variants 9](#_Toc151472826)

[Optimization of C10 diacid and UndB concentration for 1,7-octadiene production 9](#_Toc151472827)

[Co-expression of hCAIICSD and UndB in a single *E. coli* cell 10](#_Toc151472828)

[Ribosomal-binding site (RBS) optimization of co-expressed UndB and hCAIICSD 10](#_Toc151472829)

[Structure calculations 12](#_Toc151472830)

[Section 2: Supplementary Figures 13](#_Toc151472831)

[Figure S1 Expression of hCAIICSD WT and UndB WT in *E. coli*. 13](#_Toc151472832)

[Figure S2 Fluorescence labeling of the E. coli cells equipped with hCAIICSD WT. 14](#_Toc151472833)

[Figure S3 pH-dependent activitiy profiles of UndB WT (in whole-cell) and Ru1·hCAIICSD WT (in whole-cell). 15](#_Toc151472834)

[Figure S6 Screening of the Ru1·hCAIICSD R3 92_SSM, 198_SSM, and 199_SSM libraries. 18](#_Toc151472835)

[Figure S7 Directed evolution of Ru1·hCAIICSD for the enhanced production of Cy6. 19](#_Toc151472836)

[Figure S8 SDS-PAGE analysis for the expression and purification of hCAII variants. 20](#_Toc151472837)

[Figure S9 Schematic representation of the whole-cell-based screening assay for the evolution of the UndB decarboxylase. 21](#_Toc151472838)

[Figure S10 Alanine scan of fifteen amino acid residues of UndB decarboxylase. 22](#_Toc151472839)

[Figure S11 Screening of the site-saturation mutagenesis libraries (SSM) of UndB. 23](#_Toc151472840)

[Figure S12 Optimization of 1,7-octadiene production by varying the catalyst and substrate concentrations. 24](#_Toc151472841)

[Figure S13 Production of 1,7-ocatadiene by the co-expression strains 25](#_Toc151472842)

[Figure S14 Histogram of the distribution of RBS strengths after applying the RedLibs algorithm to the large library of RBS strengths 26](#_Toc151472843)

[Figure S16. Fitted curves for the determination of the *KD* of hCAII to DNSA and Ru1.The titrations were performed in triplicate and the standard deviations are displayed 28](#_Toc151472845)

[Figure S17 Calibration curves of the dienes used for the GC-MS analysis 28](#_Toc151472846)

[Figure S18 Calibration curves of the cycloalkene products used for the GC-MS analysis 29](#_Toc151472847)

[Section 3: Supplementary Tables 29](#_Toc151472848)

[Table S1 Strains and cultivation conditions for protein expression. 29](#_Toc151472849)

[Table S2 Primers used for engineering hCAIICSD. 29](#_Toc151472850)

[Table S3 Primers used for engineering UndB. 31](#_Toc151472851)

[Table S4 Numerical summary of Figure 2a. 32](#_Toc151472852)

[Table S5 Numerical summary of Figure 3b. 33](#_Toc151472853)

[Table S6 Numerical summary of Figure 3c.. 33](#_Toc151472854)

[Table S7 Numerical summary of Figure 4a. 34](#_Toc151472855)

[Table S8 E. coli strains used for co-expression of UndB and hCAIICSD. 34](#_Toc151472856)

[Table S9 Primers used for engineering the ribosome binding sites. 35](#_Toc151472857)

[Table S10 Yields of 1,7-octadiene and Cy6 catalyzed by the RBS optimized strains. 35](#_Toc151472858)

[Table S11 Yields of 1,6-heptadiene/1,8-nonadiene and Cy5/7 catalyzed by the pRSF-UndB and pACYC-hCAIICSD co-expression strains. 36](#_Toc151472859)

[Table S12 Numerical summary of Figure S2. 37](#_Toc151472861)

[Table S13 Numerical summary of Figure S3 37](#_Toc151472862)

[Table S14 Numerical summary of Figure S4 37](#_Toc151472863)

[Table S15 Numerical summary of Figure S6b–c–d. 38](#_Toc151472864)

[Table S16 Numerical summary of Figure S7b–c–d. 40](#_Toc151472865)

[Table S17 Numerical summary of Figure S10b. 41](#_Toc151472866)

[Table S18 Numerical summary of Figure S11. 42](#_Toc151472867)

[Table S19 Numerical summary of Figure S12. 42](#_Toc151472868)

Appendix

DNA sequence of UndB WT 43

DNA sequence of hCAII WT 44

DNA sequence of PelB-INPN-hCAII WT (hCAIICSD) 44

[Code availability 45](#_Toc151472869)

[References 45](#_Toc151472869)

# Section 1: Supplementary Methods

### Chemicals and Materials

All chemicals were purchased from various manufacturers and used without further purification. Cyclopentene (**Cy5**, 96%), cyclohexene (**Cy6**, 99%), cycloheptene (**Cy7**, 97%), undec-1-ene (99%), 1,6-heptadiene (**C7 diene**, 99%), 1,8-nonadiene (**C9 diene**, 99%), 1,9-decadiene (**C10 diene**, 97%), 1,10-undecadiene (**C11 diene**, 97%), 1,11-dodecadiene (**C12 diene**, 97%), lauric acid (99%), sebacic acid (**C10 diacid**, 99%), undecanedioic acid (**C11 diacid**, 97%), dodecanedioic acid (**C12 diacid**, 97%), tridecanedioic acid (**C13 diacid**,96%), tetradecanedioic acid (**C14 diacid**, 97%), acetophenone (99%), ethanol (EtOH, 99%), MOPS, glucose (99%), and glycerol (99%) were bought from Sigma Aldrich and TCI Chemicals. Dimethyl sulfoxide (DMSO, 99%), 1,7-octadiene (**C8 diene**, 99%), azelaic acid (**C9 diacid**, 99%), KH2PO4, K2HPO4, Na2HPO4, and NaH2PO4 were purchased from Acros Organics. Ethyl acetate (GC-MS grade) was bought from Thermo Scientific. The sulfonamide fluorescent probe **4a** and the **Ru1** cofactor were synthesized according to published procedures1-3.

Phusion high fidelity DNA polymerase, NEBuilder® HiFi DNA Assembly Master Mix, NEBridge® Golden Gate Assembly Kit (*BsaI*-HF® v2), T4 DNA ligase, *DpnI* restriction enzyme, plasmid miniprep-kit, gel extraction-kit, and *E. coli* LEMO21 chemically-competent cells were purchased from New England BioLabs (NEB). DNA oligonucleotides were ordered from Microsynth. The fast-digest restriction enzymes were bought from Thermo Scientific.

### Gas Chromatography-Mass Spectrometry (GC-MS) analysis

The product extraction of the decarboxylation-RCM reaction cascade and the GC-MS analysis of corresponding products were conducted as previously reported4.In brief, the products were extracted from the reaction mixture with ethyl acetate and analyzed using a Shimadzu GC-2010 Plus system coupled with a GC-MS-QP2020 detector (column: Agilent HP-5 (30 m × 0.25 mm × 0.25 μm)) using the following temperature program: start at 40 °C, keep for 0.5 min, then increase to 280 °C at 40 °C·min–1, and hold at 280 °C for 0.5 min. **C7–12 dienes** were detected in the total ion chromatogram (TIC) and quantified using the selective ion monitoring mode (SIM) at m/z = 67. An internal standard ([**1-tridecene**] = 1 mM) was used for the calibration curves and to determine the yields of the reactions (see **Figure S17**). **Cy5–7** were detected as previously reported.4

### Quantification of the surface-displayed hCAII WT (hCAIICSD WT)

*E. coli* LEMO21 (DE3) cells with the transformed PelB-INPN-hCAII wild-type (hereafter hCAIICSD WT) were induced using a protocol as summarized in **Figure S5**. The freshly expressed *E. coli* cells were harvested and gently re-suspended in a MOPS buffer (50 mM, NaCl (154 mM), pH 7.4, OD600 = 5). The cell suspensions (1 mL) were transferred to 1.5 mL Eppendorf tubes and centrifuged (25 °C, 10000 g, 1 min). The cell pellets were re-suspended in a MOPS buffer (1 mL, 50 mM, NaCl (154 mM), pH 7.4) supplemented with fluorescent probe **4a** (10 μM) and incubated (25 °C, 300 rpm, 30 min), **Figure S2**. The cell pellets were obtained by centrifugation (25 °C, 10000 g, 1 min). For cell washing, the pellets were re-suspended in a MOPS buffer (1 mL, 50 mM, NaCl (154 mM), pH 7.4), incubated (25 °C, 900 rpm, 8 min), and centrifuged (25 °C, 10000 g, 1 min). The washing step was repeated one more time. The cell pellets were re-suspended in a MOPS buffer (1 mL, 50 mM, NaCl (154 mM), pH 7.4) and aliquots thereof (200 μL) were individually transferred to a 96-well microtiter plate (flat-bottom, black). The fluorescence of the samples was measured with a TECAN Pro1000 plate reader (excitation: 493 nm; emission: 520 nm, Gain 120).

### Determination of the binding affinity (KD) of hCAII for Ru1

The binding affinity of **Ru1** to hCAII was determined using a previously-reported competitive assay.2, 5 For the affinity assays, a buffer containing MOPS (50 mM), NaCl (154 mM), glucose (1% w/w), and ZnSO4 (0.5 mM) (pH 7.4) was used. Firstly, the *K*D of dansylamide (hereafter **DNSA**) to hCAII was determined. Aliquots of a solution of purified hCAII (WT or variant, 0.25 μM) in the MOPS buffer were incubated with increasing amounts of **DNSA** (0.005 to 300 μM) in a 96-well microtiter plate (flat-bottom, black) (25°C, 300 rpm, 45 min). The fluorescence of the samples was measured using a Tecan Infinite Pro1000 plate reader (excitation: 280 nm; emission: 470 nm). To determine the binding affinity of **Ru1** to hCAII, **Ru1** (0.02 to 300 μM) was titrated against fixed concentrations of **DNSA** (100 μM) and hCAII (2.25 μM). The *K*D(**DNSA**) of **DNSA** to hCAII and the *K*D(**Ru1**) of **Ru1** to hCAII were calculated as described previously.2

### Optimization of Ru1 loading and incubation temperature for the production of **Cy6**

The freshly expressed *E. coli* cells with surface-displayed hCAIICSD WT were harvested (4 °C, 2500 g, 8 min) and gently re-suspended in a MOPS buffer (2 mL, 50 mM, NaCl (154 mM), ZnSO4 (0.5 mM), pH 7.4, OD600 = 10). Aliquots thereof (2 mL) were transferred to a round-bottom 24-well plate. Then, the **Ru1** cofactor (20 μL of a 0.2, 0.5, 1, or 2 mM stock solution in acetone, final concentration 2, 5, 10 or 20 μM) was added, and the plates were incubated (20 °C, 200 rpm, 45 min). Subsequently, the cells were collected by centrifugation (4 °C, 2500 g, 5 min). For cell washing, the cells were gently re-suspended in a MOPS buffer (4 mL each, 50 mM, NaCl (154 mM), ZnSO4 (0.5 mM), pH 7.4), incubated (20 °C, 250 rpm, 8 min), and centrifuged (4 °C, 2500 g, 5 min). This washing step was repeated once. Next, the cells were re-suspended in a MOPS buffer (400 μL each, 50 mM, NaCl (154 mM), ZnSO4 (0.5 mM), pH 7.4). To perform the RCM reactions, cell samples (100 μL each) were transferred into 2 mL GC vials and supplemented with 1,7-octadiene (2 μL of a 100 mM stock in DMSO, final concentration 2 mM). The GC vials were tightly sealed and incubated (20, 25, or 30 °C, 300 rpm, 20 h). The product **Cy6** was extracted with ethyl acetate and analyzed by GC-MS using the protocol described above. The results of the optimization are summarized in **Figure S4**.

### Directed evolution of the cell surface-displayed artificial metathase (Ru1·hCAIICSD)

The site-directed mutagenesis (SDM) library of hCAIICSD at positions R58, N62, H64, N67, E69, and D72 was generated by PCR using the primers listed in **Table S2**. The PCR products were analyzed by agarose gel electrophoresis and digested with a *DpnI* restriction enzyme (37 °C, 16 h). The digested samples were inactivated (80 °C, 20 min) and directly transformed into *E. coli* LEMO21 (DE3) chemically-competent cells. These transformed cells were plated on an agar plate and incubated (37 °C, 14 h), individually. Colonies with the correct sequences were inoculated into pre-cultures (3 mL, LB medium supplemented with kanamycin (50 μg/mL)). The hCAIICSD variants were individually expressed in main cultures (50 mL, LB medium supplemented with glucose (0.2% w/w), ZnSO4 (0.5 mM), kanamycin (50 μg/mL)) in 250 ml baffled shaking flasks. More details regarding the protein expression, whole-cell-based catalysis, and activity screening are described in **Figure S5**. The resultsregarding the **Cy6** production of the SDM library and the subsequent recombination variants are summarized in **Figure S7a–b**.

The saturation mutagenesis plasmid libraries (SSM) of hCAIICSD R3 at positions Q92, L198, and T199 were generated by PCR using the NNK primers listed in **Table S2**. The PCR products were analyzed by agarose gel electrophoresis and digested with a *DpnI* restriction enzyme (37 °C, 16 h). The digested samples were inactivated (80 °C, 20 min) and then transformed into *E. coli* Top10 chemically-competent cells. These transformed cells were plated on an agar plate and incubated (37 °C, 14 h), individually. The colonies of each library were pooled in a tube containing an LB medium (3 mL) and the plasmids were extracted by miniprep. The collected plasmids were then transformed into *E. coli* LEMO21 (DE3) chemically-competent cells. These transformed cells were plated on an agar plate and incubated (37 °C, 14 h). The colonies of the SSM libraries were individually inoculated in main cultures (1 mL, LB medium supplemented with glucose (1% w/w), ZnSO4 (0.5 mM), and kanamycin (50 μg/mL)) in 2 mL round-bottom 96-well plates. More details regarding the protein expression, whole-cell-based catalysis, and activity analysis of the hCAIICSD R3 92_SSM, 198_SSM, and 199_SSM SSM libraries are summarized in **Figure S6**. Rescreening of the high-performing variants hCAIICSD R3 92_SSM, 199_SSM and the recombined R5 variant were performed using the protocol described in **Figure S5.** Theresultsare summarized in **Figure S7c–d**

### Cytoplasmic expression of the hCAII variants and in vitro RCM in the production of cycloalkenes

To produce soluble hCAII, it was expressed in the cytoplasm. The constructs were obtained by truncating the DNA sequence of PelB-PNPN auto-transporter domain using overlapping PCR (the Fw/Rev PelB-INPN-truncated primers are listedin **Table S2**). The PCR products were transformed into *E. coli* BL21(DE3) electro-competent cells.

The cytoplasmic hCAII variants were expressed in main cultures (1 L, LB medium supplemented with glucose (0.2% w/w), ZnSO4 (0.5 mM), and kanamycin (50 μg/mL)) in 5 L baffled flasks. The pre-cultures were inoculated into the main cultures and the suspensions were incubated (37 °C, 125 rpm) until the OD600 reached 0.5 (initial OD600 =0.05). The cells were induced by adding isopropyl β-D-1-thiogalactopyranoside (IPTG, 0.5 mM final concentration) and further incubated (25 °C, 125 rpm for 18 h). Subsequently, the cells were harvested by centrifugation (4 °C, 4400 g, 30 min) and the pellets were stored at **–**20 °C until use. The affinity purification of the cytoplasmic hCAII variants were carried out using a column with a precast sulfonamide resin using a protocol previously reported.2 **Figure S8b** depicts an example of an SDS-PAGE of hCAII R5 (R58A/E69A/D72L/Q92P/L198P).

The *in vitro* RCM of 1,6-heptadiene, 1,7-octadiene, or 1,8-nonadiene was performed with purified hCAII. First, aliquots of a solution of **Ru1** (15 μM) and hCAII (60 μM) in a MOPS buffer (100 μL, 200 mM, NaCl (154 mM), glucose (1% w/w), ZnSO4 (0.5 mM), pH 7.4,) were incubated (20 °C, 150 rpm, 30 min) to ensure the binding of **Ru1** to hCAII. The reaction was initiated by adding 1,6-heptadiene, 1,7-octadiene, or 1,8-nonadiene (2 μL of a 250 mM stock solution in EtOH, final concentration 5 mM) to the aliquots and further incubating the mixtures (20 °C, 150 rpm, 40 h). The corresponding **Cy5–7** products were extracted by adding ethyl acetate (1 mL) spiked with acetophenone (1 mM) as an internal standard. The quantification of the **Cy5–7** products was conducted by GC-MS as described above. The results are summarized in **Figure 3c** and **Table S6**.

### Directed evolution of the UndB decarboxylase

The alanine-substituted mutants of UndB at positions I89, M92, R121, L126, S132, D137, E139, E140, S254, M257, Q271, T272, V301, and R308 were generated by SDM. The primers used for the PCRs are listed in **Table S3**. The PCR products were digested with the *DpnI* restriction enzyme (37 °C, 16 h) and transformed into *E. coli* TOP10 chemically-competent cells. Colonies with the correct DNA sequences were inoculated into an LB medium (3 mL, supplemented with kanamycin (50 μg/mL)) and the suspensions were incubated (37 °C, 300 rpm), 14 h). The plasmids were individually extracted and transformed into *E. coli* BL21 (DE3) chemically-competent cells.

To express the alanine-substituted UndB variants, freshly-transformed colonies were inoculated into individual main cultures (3 mL, LB medium supplemented with FeCl3 (0.15 mM) and kanamycin (50 μg/mL)) in a round-bottom 24-well plate. The plates were incubated (37 °C, 250 rpm) until the OD600 reached 0.4–0.5. The cells were induced by adding IPTG (10 μL of a 45 mM stock, final concentration 0.15 mM) and further incubated (16 °C, 250 rpm, 16 h). Each variant was expressed in triplicate in three individual round-bottom 24-well plates. More details regarding the UndB expression, whole-cell catalysis, and activity analysis of the alanine-substituted UndB variants can be found in **Figure S9** and **S10.**

The SSM libraries of UndB at positions I89, M92, L126, S254, and M257 were generated using NNK primers (**Table S3)**. The PCR products were digested with the *Dpn1* restriction enzyme (37 °C, 16 h) and inactivated (80 °C, 20 min). The samples were then subjected to DNA cleanup to afford the purified PCR products. The *in vitro* assembly of the PCR products to cyclized plasmids was carried out with the Goldengate assembly kit, using the standard protocol from the manufacturer. The assembled plasmids were then transformed into *E. coli* TOP10 chemically-competent cells. The colonies of each library were pooled in an LB medium (3 mL), followed by a miniprep to extract the plasmids. The plasmids were then transformed into *E. coli* BL21 (DE3) chemically-competent cells. The detailed procedures regarding the protein expression, whole-cell-based catalysis, and activity analysis of the UndB SSM libraries are presented in **Figure S9**. The results of the SSM libraries screening for the decarboxylation reactions are summarized in **Figure S11a–b**.

The recombination of the beneficial mutations of UndB was conducted by SDM. The primers used in the PCRs are listed in **Table S3**. The PCR products were individually transformed into *E. coli* TOP10 chemically-competent cells. The plasmids with the correct DNA sequences were then transformed into *E. coli* BL21 (DE3) chemically-competent cells. The activities of the recombined variants in the production of 1,7-octadiene were determined using the protocol displayed above (**Figure S9**). The results are summarized in **Figure S11c**.

### Flask expression and activity validation of the evolved UndB variants

The UndB variants along with the wild-type (WT) were expressed in baffled shaking flasks. For each mutant, ten newly transformed UndB colonies (BL21(DE3)) were inoculated into a main culture (30 mL, LB medium supplemented with FeCl3 (0.2 mM) and kanamycin (50 μg/mL)) in a 250 mL baffled-shaking flask. The cells were incubated (35 °C, 250 rpm) until the OD600 reached 0.4–0.5. The cells were induced by adding IPTG (4.5 μL of a 1 M solution, final concentration 0.15 mM) and further incubated (16 °C, 180 rpm, 10 h). The expressed cells were harvested by centrifugation (4 °C, 2500 g, 8 min).

To validate the activity of the evolved UndB variants for the production of 1,7-octadiene, the freshly expressed cells were re-suspended in a buffer (100 μL, MOPS (50 mM), NaCl (154 mM), FeCl3 (0.2 mM), glucose (1% w/w), pH 7.4, OD600 = 25) and transferred into 2 mL GC vials. After adding the **C10 diacid** substrate (1 μL of a 100 mM stock in EtOH, final concentration 1 mM), the vials were sealed tightly. The samples were incubated (25 °C, 250 rpm, 4 h). The product extraction and analysis was performed as described in **Figure S9**. The results are summarized in **Figure 4a** and **Table S7**.

### Optimization of C10 diacid and UndB concentration for 1,7-octadiene production

For the optimization of the **C10 diacid** loading, the UndB I89V/L126F cells were re-suspended in a MOPS buffer (100 μL, 50 mM, NaCl (154 mM), FeCl3 (0.2 mM), glycerol (0.5% v/v), pH 7.4, OD600 = 25) and transferred into 2 mL GC vials. After adding the **C10 diacid** substrate (2 μL of a 50, 75, 100, 150, or 250 mM stock solution in EtOH, final concentration 1, 1.5, 2, 3, or 5 mM), the vials were tightly sealed. For the optimization of the UndB I89V/L126F concentration, the cells were re-suspended in a MOPS buffer (100 μL, 50 mM, NaCl (154 mM), FeCl3 (0.2 mM), glycerol (0.5% v/v), pH 7.4, OD600 = 12.5, 25, 50, or 100) and transferred into 2 mL GC vials. After adding the **C10 diacid** substrate (1 μL of a 200 mM stock in EtOH, final concentration 2 mM), the vials were tightly sealed. The mixtures were incubated (25 °C, 250 rpm, 4 h). The results are summarized in **Figure S12.**

To determine the conversion of the decarboxylation of lauric acid (mono fatty acid, **C12**) and **C9–C14 diacids** by UndB, the freshly expressed UndB cells were suspended in a MOPS buffer (50 mM, NaCl (154 mM), FeCl3 (0.2 mM), glycerol (0.5% v/v), pH 7.4, OD600 = 25) and transferred into 2 mL GC vials (100 μL each). After adding the corresponding substrates (1 μL of a 200 mM **C9–10 diacid** stock soltution or 2 μL of a 100 mM lauric acid/**C11–14** **diacid** stock solution in EtOH, final concentration 2 mM), the vials were tightly sealed and incubated (20 °C, 250 rpm, 24 h). The product extraction and analysis were performed as described in **Figure S9**.

### Co-expression of hCAIICSD and UndB in a single E. coli cell

UndB and hCAIICSD were co-expressed in a single cell using two strategies: i) sequential cloning in one pRSF-duet vector or ii) using two biocompatible vectors, such as pRSF/pACYC, or pRSF/pET-11b. The plasmids were constructed using the NEBridge® Golden Gate Assembly Kit (*BsaI*-HF® v2), applying the protocol provided by the manufacturer. The generated plasmids were then transformed or co-transformed into *E. coli* BL21 (DE3) or LEMO21 (DE3) chemically-competent cells (**Table S8)**. The decarboxylation activities of the co-expressed UndBs (WT and variant I89V/L126F) were evaluated using **C10 diacid** as substrate (**Figure S9**). All of the co-expressed UndBs exhibited reduced production of 1,7-octadiene compared to the corresponding pRSF-UndB WT and pRSF-UndB I89V/L126F strains (**Table S6** and **Figure S13**). These results suggest a competitive effect among co-expressed proteins in a single *E. coli cell* of shared cellular resources, such as ribosomes.6

### Ribosomal-binding site (RBS) optimization of co-expressed UndB and hCAIICSD

The 17 nucleotides upstream of the start codon of the hCAIICSD R5 coding sequence, i.e. AAGAAGGAGATATACAT, were used a template sequence for the RBS library for both hCAIICSD R5 and UndB I89V/L126F. To generate an initial set of library sequences *in silico*, the template sequence was varied with up to 4 simultaneous mutations within a 12-nucleotide window sliding along the sequence. For instance, AAGAA[NGANATNNACAT] has four mutations (N) within the last 2 nucleotides (square brackets) similar to AAG[AANNANNTATAC]AT, which contains another set of mutations within another 12-nucleotide sliding window. This approach generated 121426 individual sequences that vary at most at four positions with respect to the template sequence, whereby two mutations have a maximal distance of 12 nucleotides. Using this set of 121426 sequences, RBS “strength” predictions were generated using the uASPIre/SAPIENs model provided by Höllerer et al.7 The obtained RBS strength values corresponded to the slope of the cell-specific GFP signals in the publication of Höllerer et al. To obtain a library size that is small enough to be screened and evenly distributed over the accessible range of RBS strengths, we used the RedLibs algorithm,8 which reduces a large library to a subset that can be expressed in a single degenerate sequence, while the encoded library corresponds to RBS strengths that are uniformly distributed. Here, we selected a target library size of 96, which resulted in the degenerate sequence AAGA**H**GG**N**G**N**TAT**M**CAT (degenerate part in bold, **Figure S14**) that was incorporated into the primer design to generate the physical libraries (**Table S9**).

The RBS libraries of pRSF-UndB I89V/L126F and pACYC-hCAIICSD R5 were individually generated by PCR using the corresponding degenerate primers (**Table S9**). The PCR products were then digested with the *DpnI* restriction enzyme (37 °C, 16 h) and transformed into *E. coli* Top 10 competent cells. These transformed cells were plated on three agar plates. The colonies from each library were pooled in an LB medium (2 mL) and subjected to a miniprep to obtain the plasmids. The resulting plasmids from the two RBS libraries were co-transformed into BL21 (DE3) electrocompetent cells and plated on the agar plates (supplemented with kanamycin (50 μg/mL) and chloramphenicol (35 μg/mL)) and incubated (37 °C, 16 h).

To identify the most robust co-expression strains and to limit the screening effort, a colony refining process was conducted. In brief, after co-transformation, all colonies were pooled in an LB medium (3 mL). A sample (100 μL) was iteratively diluted to OD600 = 1x10-6. The diluted sample was then plated onto three new agar plates (supplemented with kanamycin (50 μg/mL) and chloramphenicol (35 μg/mL)) and incubated (37 °C, 16 hours). The steps described above (pooling, dilution, and inoculation) were repeated one more time. The refined CoEx3* RBS colonies were then expressed and screened by applying the protocol described in **Figure S15**. The ten most productive strains for the production of **Cy6** were subjected to a rescreening (**Table S10**).

A modified protocol was employed for rescreening the ten most productive RBS CoEx3* strains. In brief, the freshly co-transformed colonies were inoculated into an LB medium (30 mL, supplemented with kanamycin (50 μg/mL), chloramphenicol (35 μg/mL), FeCl3 (0.15 mM), ZnSO4 (0.15 mM)) in a 250 mL baffled shaking flask. The culture was incubated (35 °C, 200 rpm) until the OD600 reached 0.4–0.5. The cells were induced by adding IPTG (45 μL of a 1 M stock solution, final concentration 0.15 mM) and further incubated (16 °C, 180 rpm, 10 h). The cells were harvested by centrifugation (4 °C, 2500 g, 10 min) and re-suspended in a MOPS buffer (25 mM, NaCl (154 mM), FeCl3 (0.15 mM), ZnSO4 (0.15 mM), glycerol (0.5% v/v), pH 7.4). The following steps were performed as summarized in **Figure S15.**

For the production of **Cy5** and **Cy7**, the CoEx3*-183 strain was used, applying the same protocol as for the production of **Cy6**, but using either **C9 diacid** or **C11 diacid** (final concentration 2 mM) as the substrate, **Figure S15**. Results are summarized in **Figure 5c** and **Table S11.**

### Structure prediction

For an initial protein structure, the crystal structure of hCAII WT with a coordinated zinc was used (PDB: 6QFX). It was processed with the PDB2PQR server9 to assign H atoms at pH 7.4. Then, the structure of **Ru1** was added so that the zinc of the protein binds to the deprotonated sulfonamido-anchor of the catalyst. The protein-catalyst hybrid structures were optimized with Gaussian09.10 The calculations were performed with UFF without any symmetry consideration. In the structural optimization, only the atoms within 8 Å of the catalyst molecule were allowed to relax. The docked structure is displayed in **Figure 2b** and **Figure S7a–c**.

# Section 2: Supplementary Figures


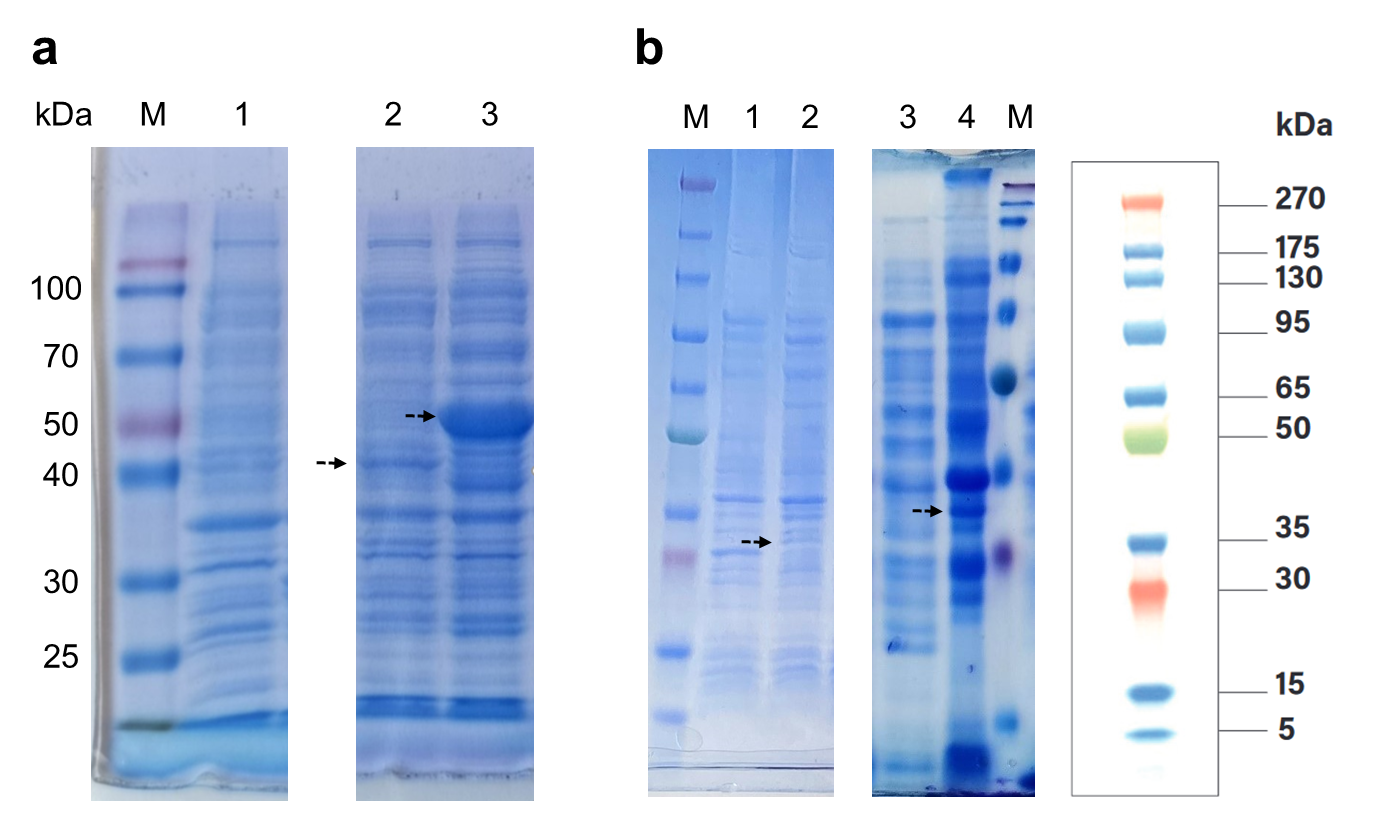


***Figure S1*** *Expression of hCAIICSD WT and UndB WT in E. coli.* ***a*** *Whole-cell sodium dodecyl-sulfate polyacrylamide gel electrophoresis (SDS-PAGE) of the cell surface-displayed hCAIICSD WT. M: standard protein ladder; Line 1: Empty vector control; Line 2: Lpp-OmpA-hCAII WT; Line 3: PelB-INPN-hCAII WT (hCAIICSD WT). The expected molecular weights of the mature proteins (after signal-peptide cleavage) OmpA-hCAII WT and hCAIICSD WT are 38.1 and 51.5 kDa and the corresponding bands are highlighted with black arrows.* ***b*** *SDS-PAGE of UndB WT. Line 1: pRSF-duet1 empty-vector control (whole-cell SDS-PAGE); Line 2: pRSF-UndB WT (whole-cell SDS-PAGE); Line 3: clear supernatant (soluble fragment) of cell lysate of pRSF-UndB WT. Line 4: membrane fragment of pRSF-UndB WT (based on a reported protocol11). The expected band of UndB WT is highlighted with a black arrow.*


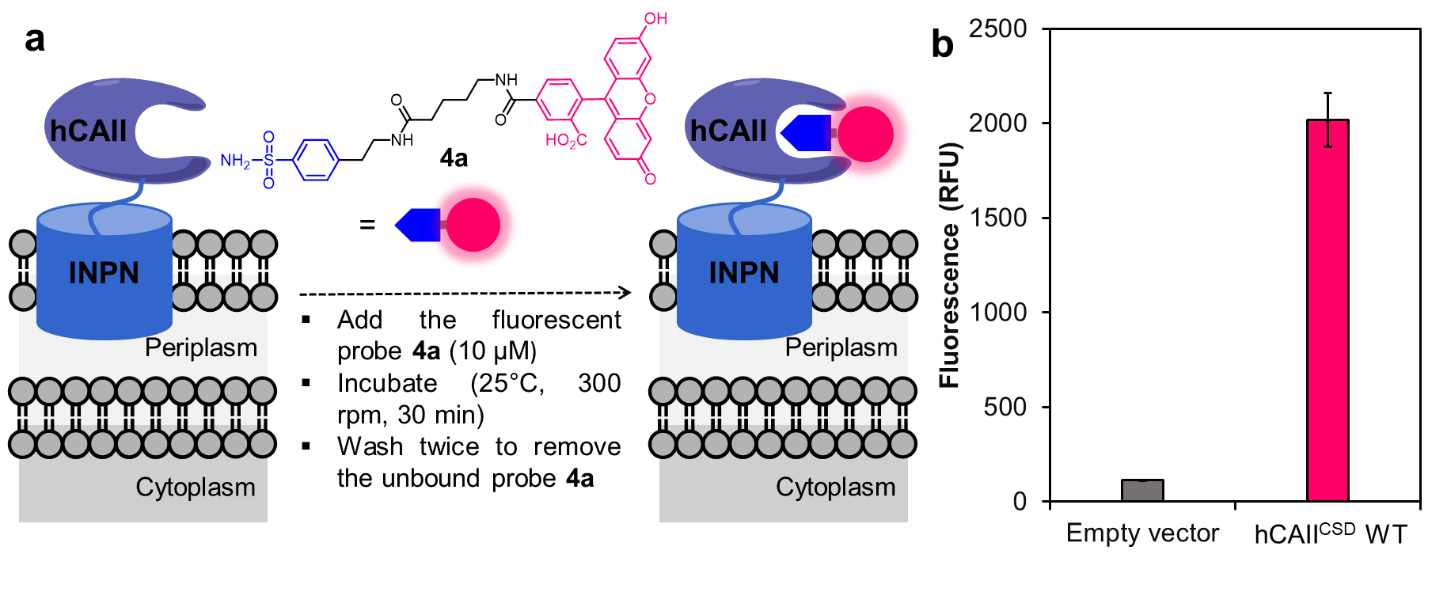


***Figure S2*** *Fluorescence labeling of the E. coli cells equipped with hCAIICSD* WT*.* ***a*** *Schematic representation of fluorescence labeling of the surface-displayed hCAIICSD* WT. *The previously-reported sulfonamide fluorescent probe* ***4a*** *was used.1* ***b*** *Cells with hCAIICSD WT exhibited a 17.7-fold higher fluorescence signal compared to the pRSF-duet1 empty vector control. The labeling experiment was performed in triplicate and the standard deviations are displayed. For a numerical summary of panel* ***b****, see* ***Table S12****.*


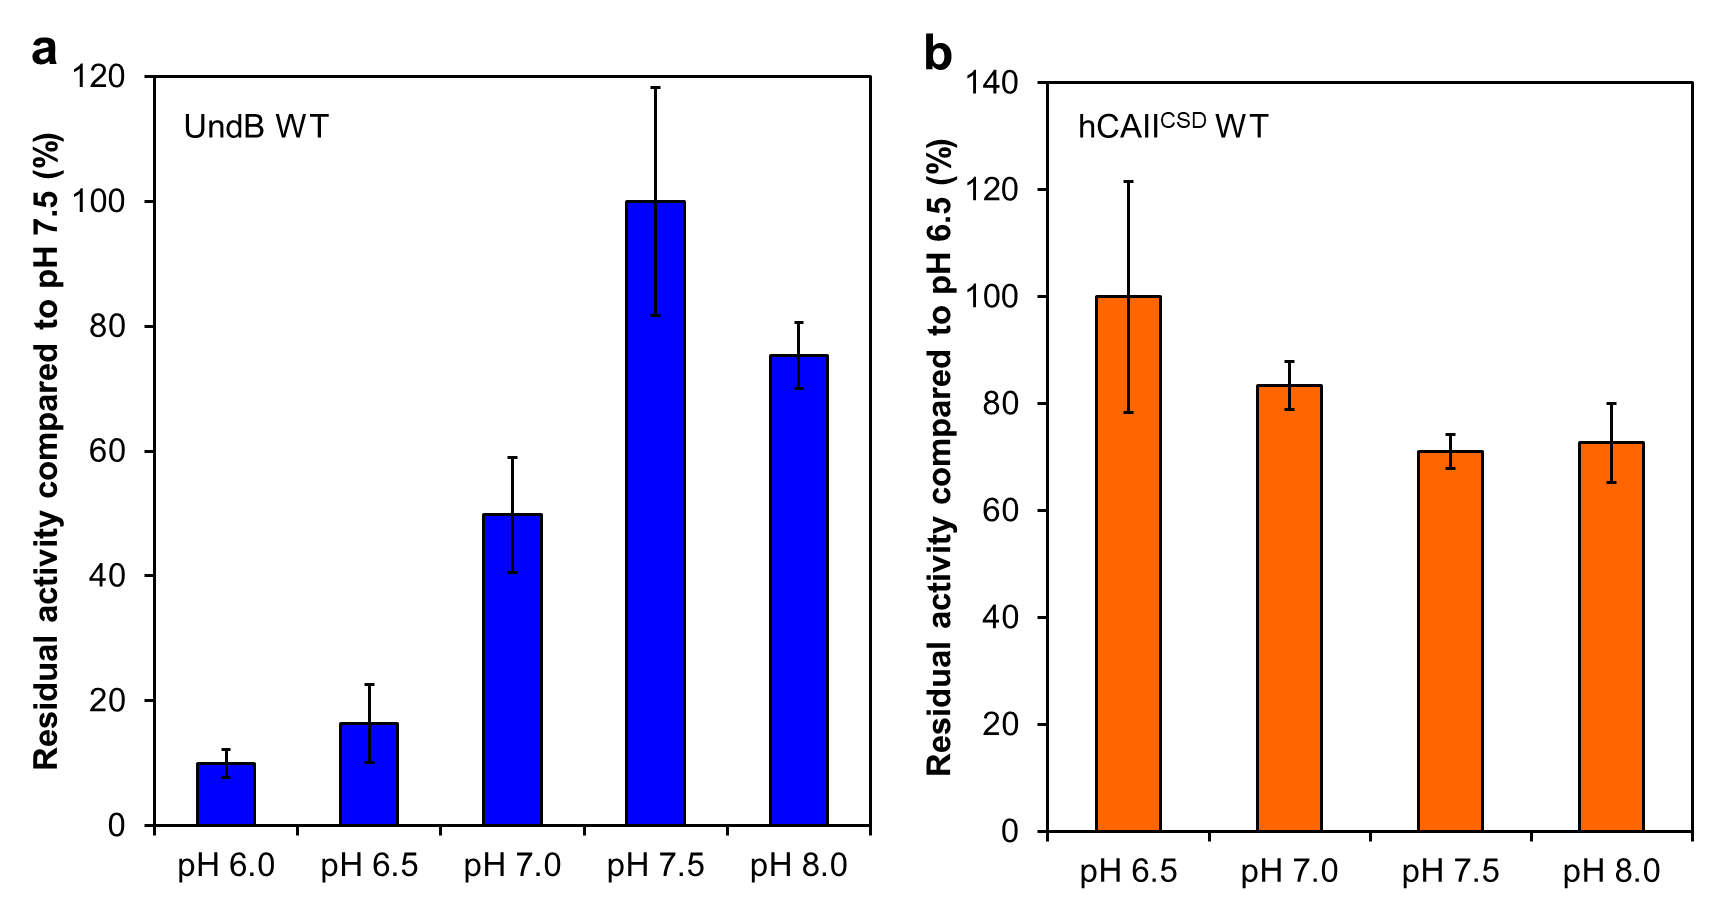


### Figure S3 pH-dependent activity profiles of UndB WT (in whole-cell) and Ru1·hCAIICSD WT (in whole-cell). a Activity of UndB WT for the production of 1,7-octadiene at different pH. The activity at different pHs is displayed as percentages relative to the activity at pH 7.5. b Activity of Ru1·hCAIICSD WT for the production of Cy6 at different pH values. The activity of Ru1·hCAIICSD WT at different pHs is displayed as percentags relative to the activity at pH 6.5. For the measurements at pH 6.0, a bis-Tris buffer (50 mM, supplemented with NaCl (154 mM) and ZnSO4 (0.5 mM)) was used. For the measurements between pH 6.5 and 8, a MOPS buffer (50 mM, supplemented with 154 mM NaCl (154 mM) and ZnSO4 (0.5 mM)) was used. The reactions were performed in triplicate and the standard deviations are displayed. For a numerical summary of panels a and b, see Table S13.


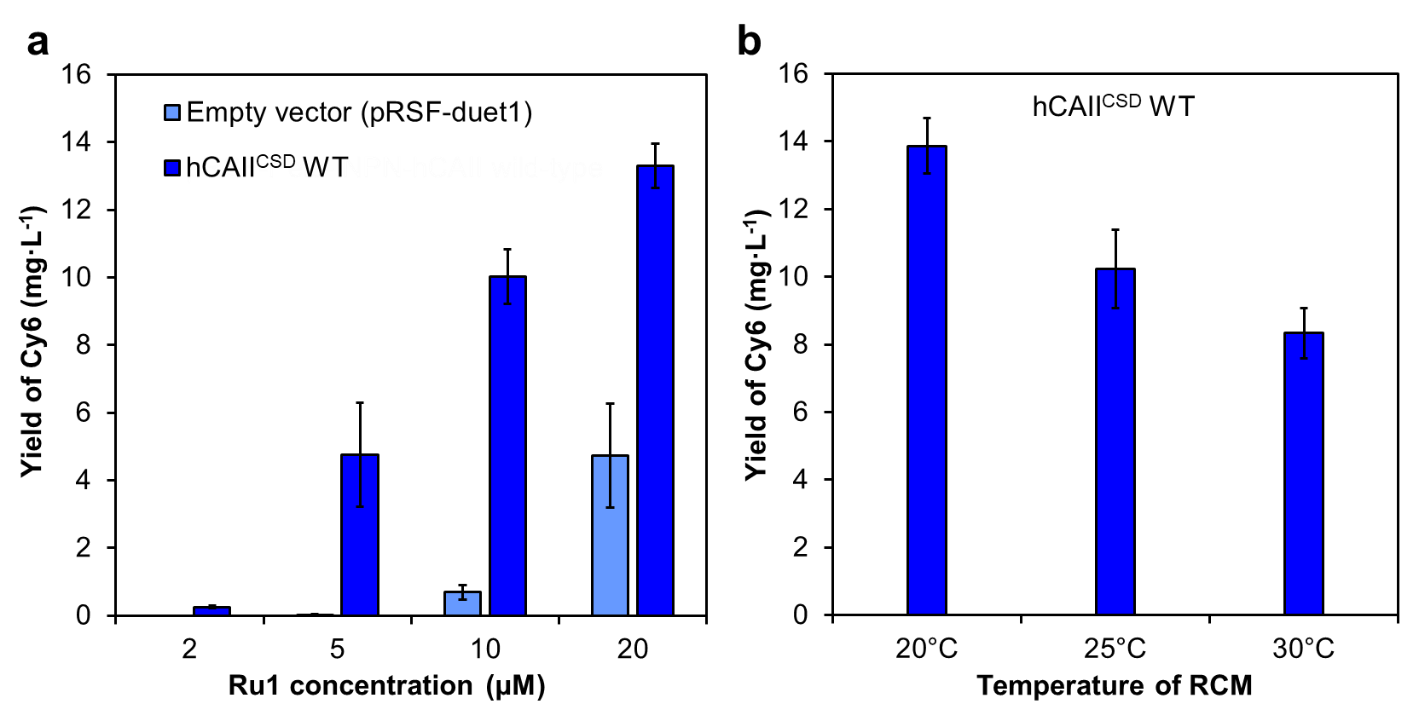


***Figure S4*** *Optimization of* ***Ru1*** *loading and incubation temperature for the production of* ***Cy6****.* ***a*** *Yield of* ***Cy6*** *a different* ***Ru1*** *concentrations.* ***b*** *Yield of* ***Cy6*** *at different incubation temperatures. The reactions were performed in triplicate and the standard deviations are displayed.* *For a numerical summary of panels* ***a*** *and* ***b****, see* ***Table S14****.*

***
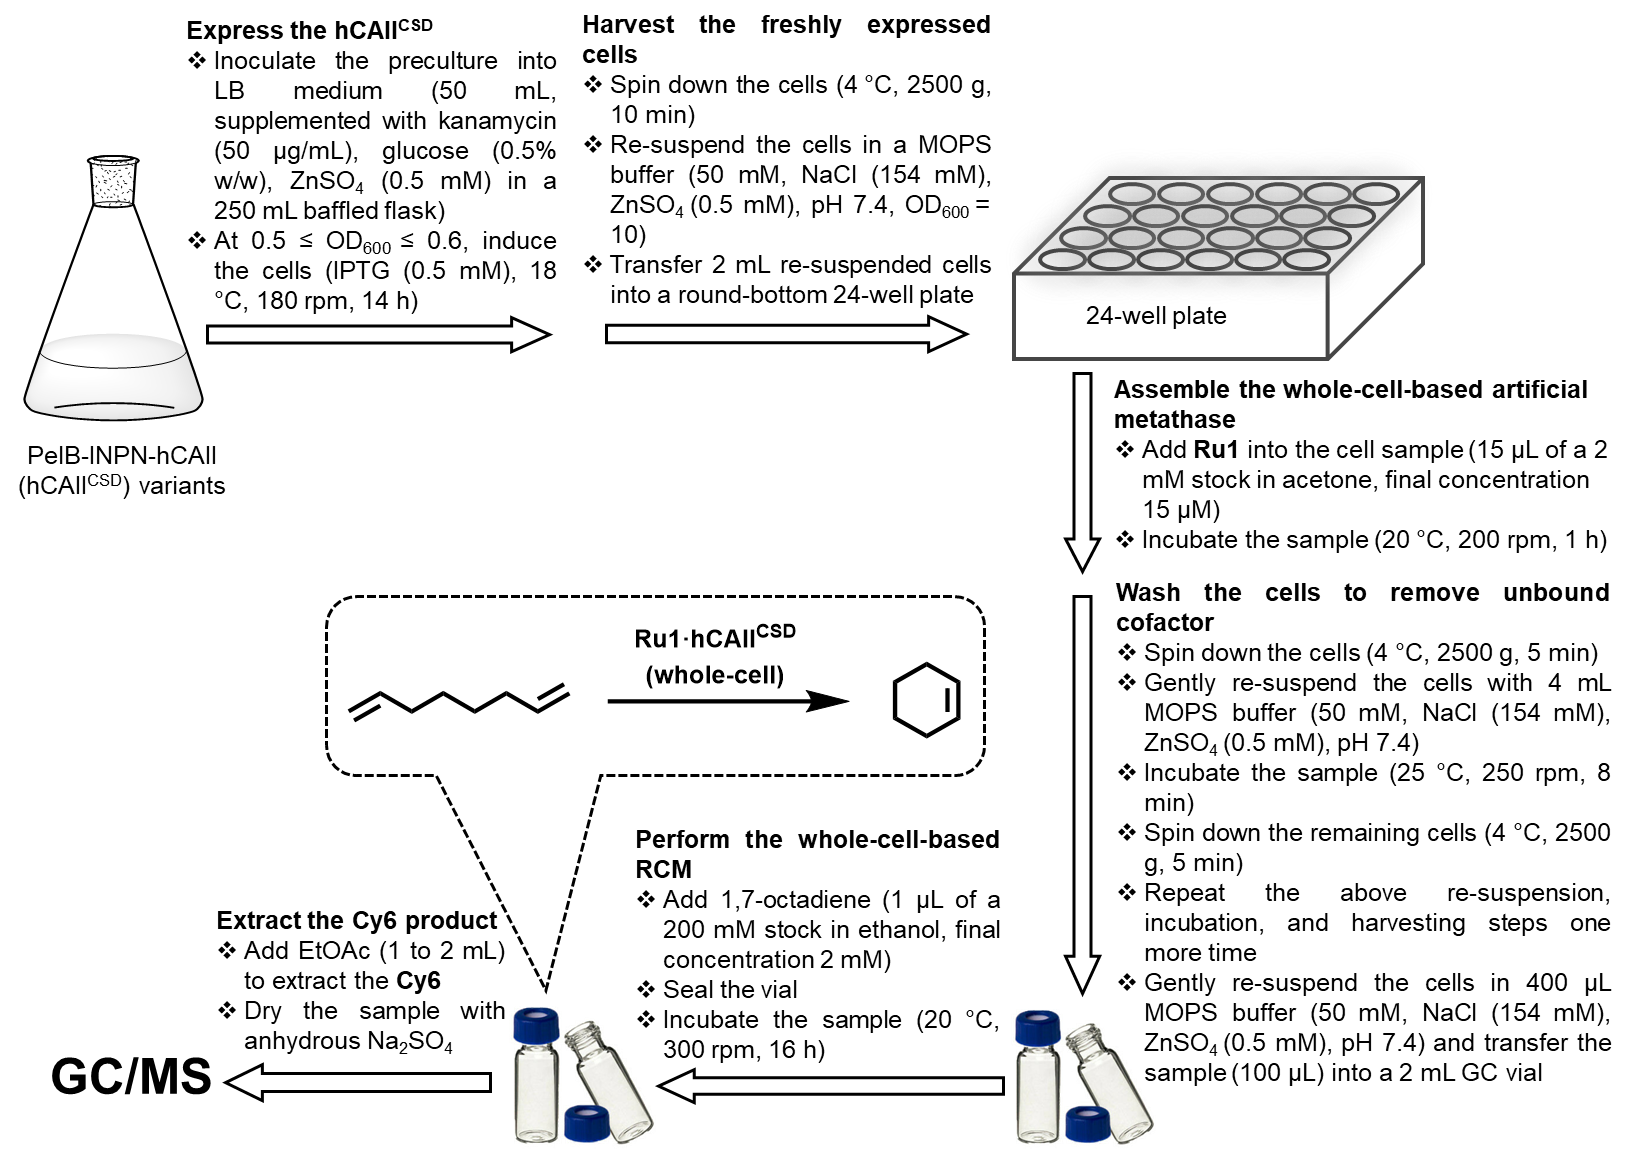
***

***Figure S5*** *Schematic representation of the screening protocol for the evolution of* ***Ru1****·hCAIICSD.*


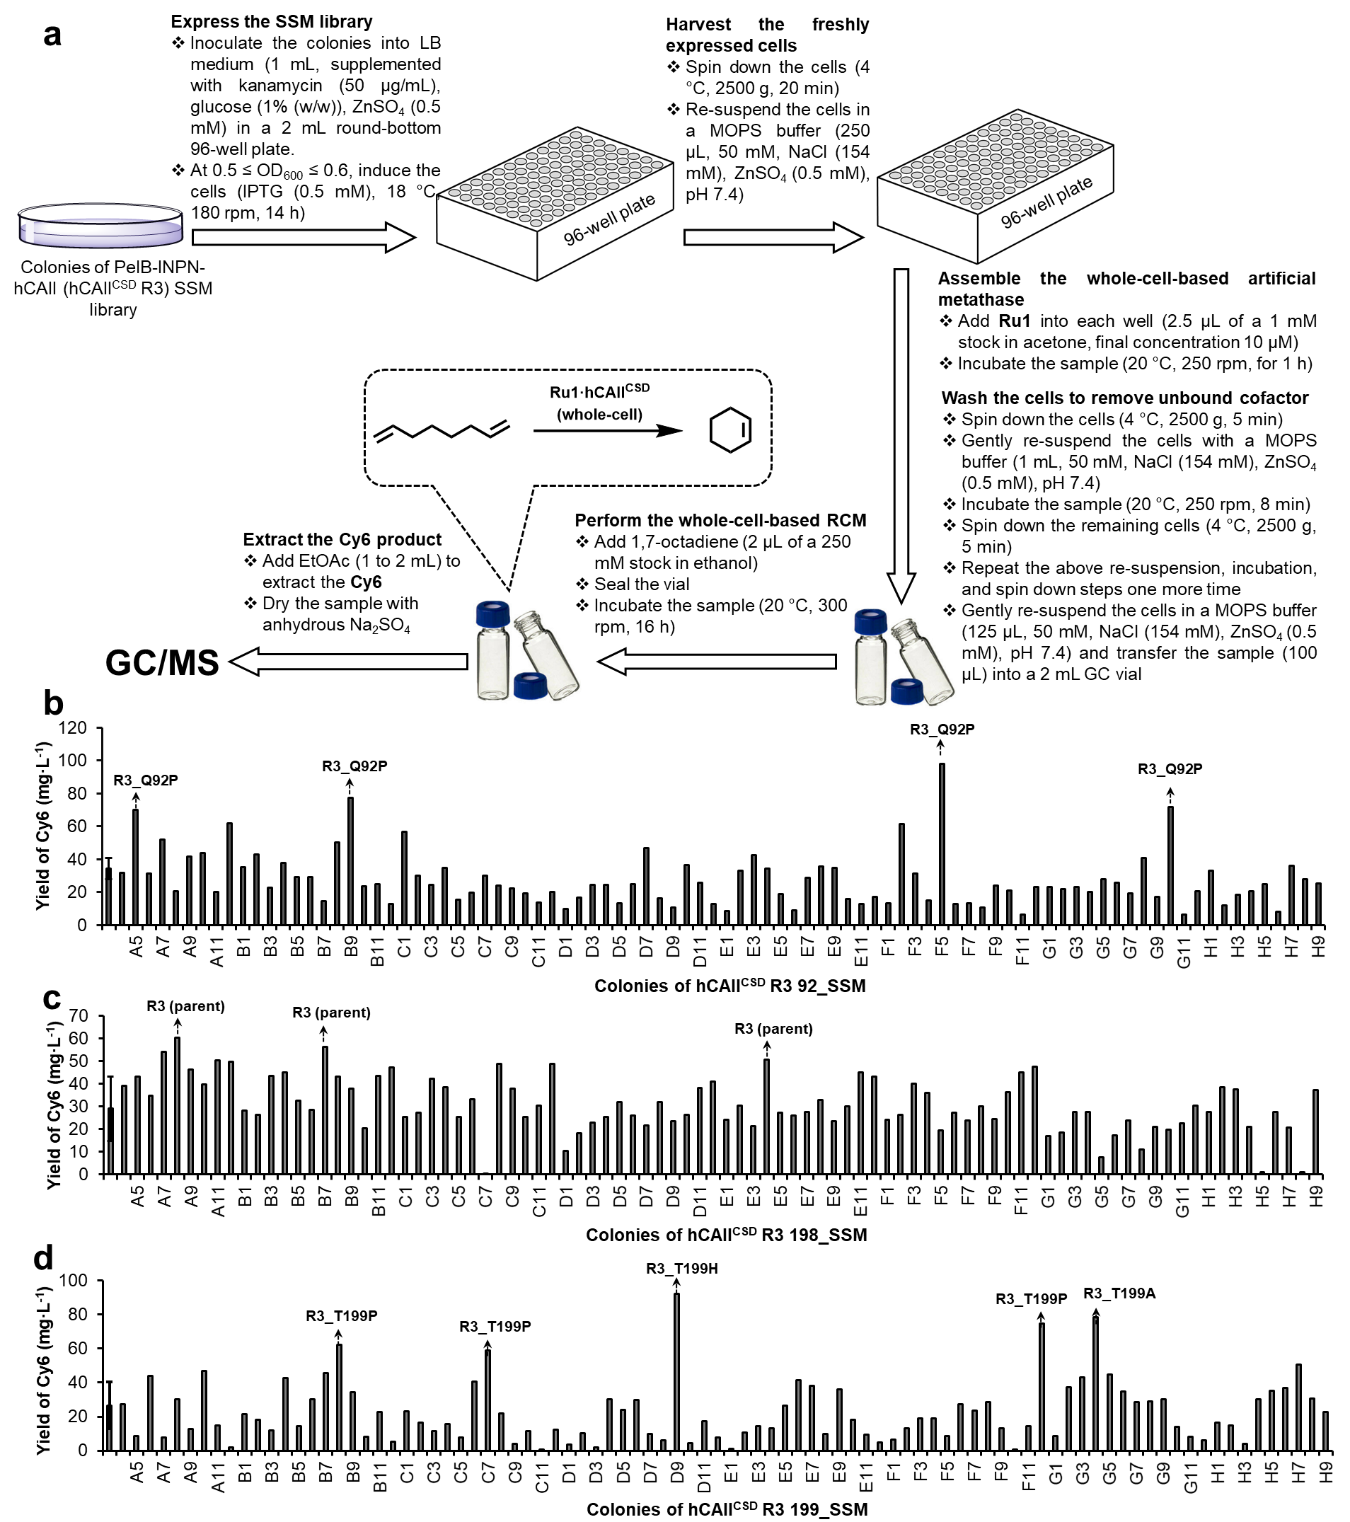


***Figure S6*** *Screening of the* ***Ru1****·hCAII*CSDR3 *92_SSM, 198_SSM, and 199_SSM libraries.* ***a*** *Schematic representation of the screening protocol using a 96-well microtiter plate.* ***b****,* ***c****, and* ***d*** *Activity of the* **Ru1***·hCAII*CSD *R3 92_SSM, 198_SSM, and 199_SSM colonies for the production of* **Cy6***. Ninety colonies from each SSM library and six replicates (in wells A1-A3, H10-H12, not displayed) of the parent (hCAIICSD R3: R58A/E69A/D72L) were screened in one 96-well plate. High-performing colonies from each SSM library were sequenced and are highlighted with black arrows.* *For a numerical summary of panels* ***b****,* ***c*** *and* ***d****, see* ***Table S15****.*


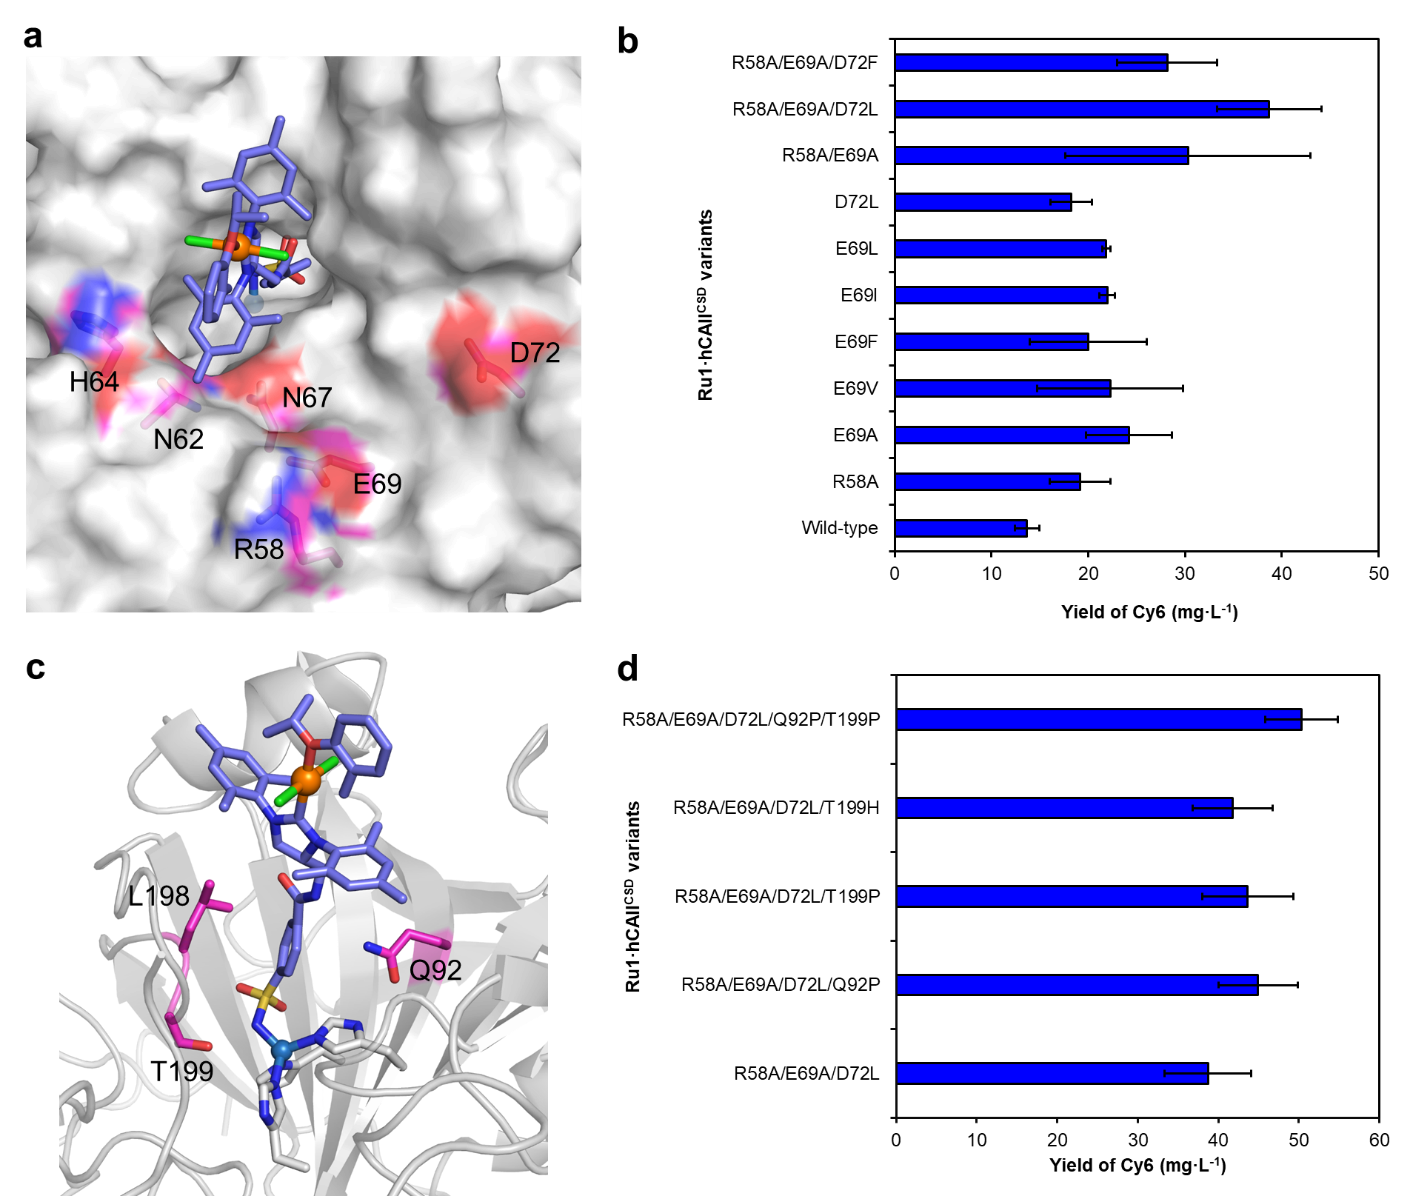


***Figure S7*** *Directed evolution of* ***Ru1****·hCAIICSD for the production of* ***Cy6***.***a*** *Docked structure of* ***Ru1****·hCAII*CSD *highlighting six charged or polar residues (R58, N62, H64, N67, E69, and D72) that lie in the proximity to the* ***Ru1*** *cofactor.* ***b*** *Activity of* ***Ru1****·hCAIICSD variants for the production of* ***Cy6.*** *The variants were identified from a site-directed mutagenesis library and subsequently recombined.* ***c*** *Docking structure depicting three residues (Q92, L198, and T199, labeled in magenta) lying within 4 Å of the sulfonamide anchor of the* ***Ru1*** *cofactor.* ***d*** *Activity of* ***Ru1****·hCAIICSD variants for the production of* ***Cy6*** *(identified from the 92_SSM and 199_SSM libraries, and subsequent recombination thereof).* The reactions were performed in triplicate and the standard deviations are displayed. *For a numerical summary of panels* ***b*** *and* ***d****, see* ***Table S16****.*


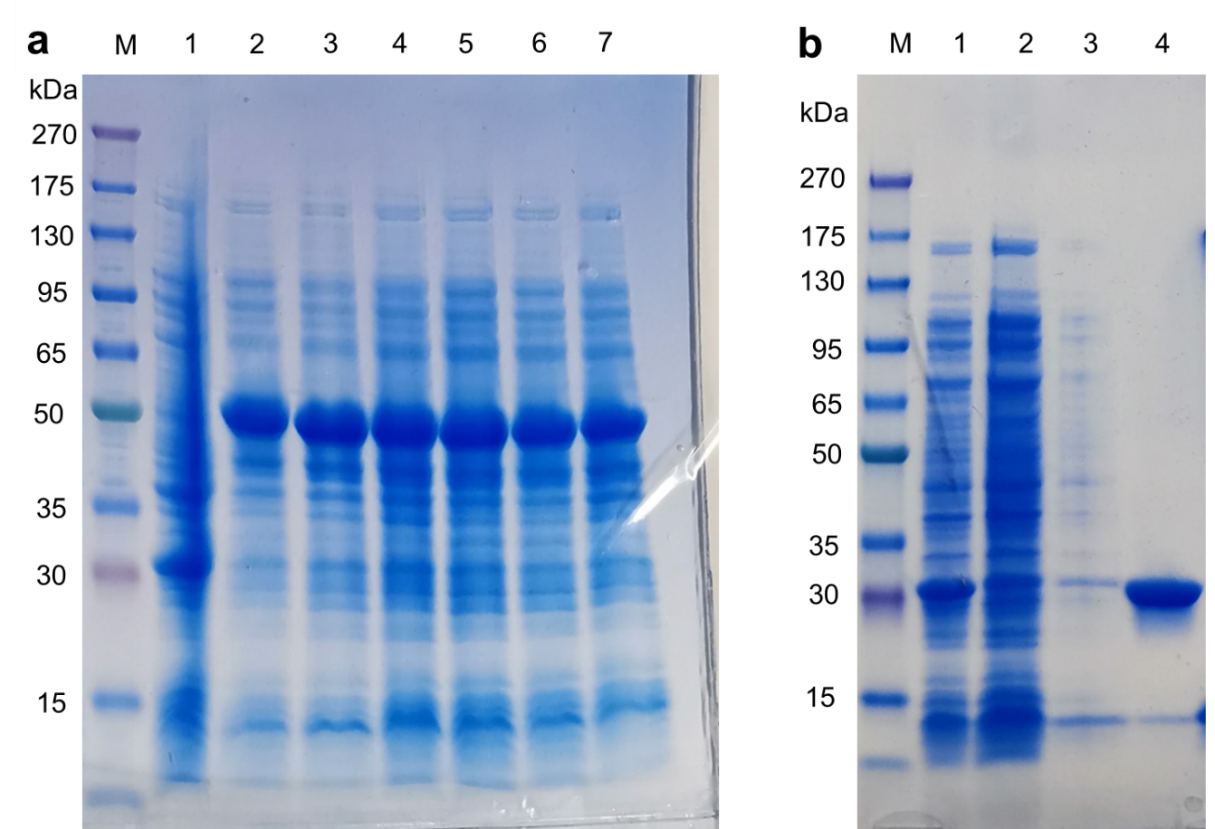


***Figure S8*** *SDS-PAGE analysis of the expression and purification of hCAII variants.* ***a*** *Whole-cell SDS-PAGE of the expressed hCAIICSD variants (molecular weights of mature proteins are around 51.5 kDa). M: standard protein ladder; Line 1: pRSF-Duet1 empty vector control; Line 2: pRSF- hCAIICSD WT, Line 3: pRSF-hCAIICSD E69A; Line 4: pRSF-hCAIICSD R58A/E69A; Line 5: pRSF-hCAIICSD R58I/E69A/D72L; Line 6: pRSF-hCAIICSD R58A/E69A/D72L/Q92P; Line 7: pRSF-hCAIICSD R58A/E69A/D72L/Q92P/T199P. Homogenous expression levels of the pRSF-hCAIICSD variants were observed.* ***b*** *Purification of the cytoplasmic hCAII R58A/E69A/D72L/Q92P/T199P (truncated PelB-INPN, molecular weight: 29.5 kDa). A column with the precast sulfonamide resin was employed for purification. M: standard protein ladder; Line 1: cell-free lysate (supernatant), Line 2: flow-through of cell-free lysate after loading to the sulfonamide resin; Line 3: flow-through of washing buffer; Line 4: elution fraction of hCAII R58A/E69A/D72L/Q92P/T199P.*


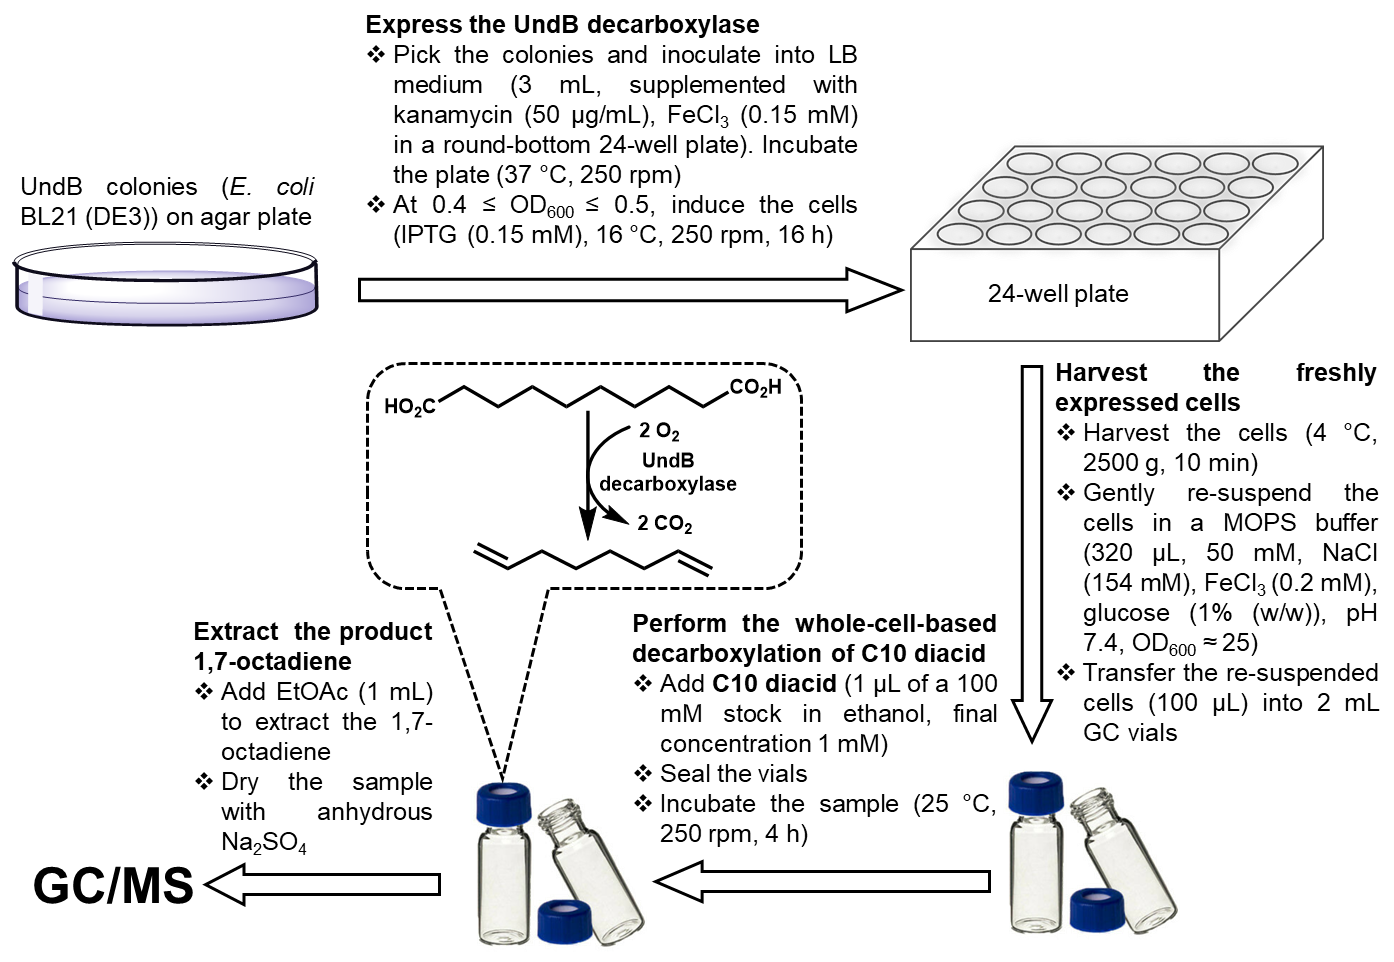


***Figure S9*** *Schematic representation of the whole-cell-based screening assay for the evolution of the UndB decarboxylase.*


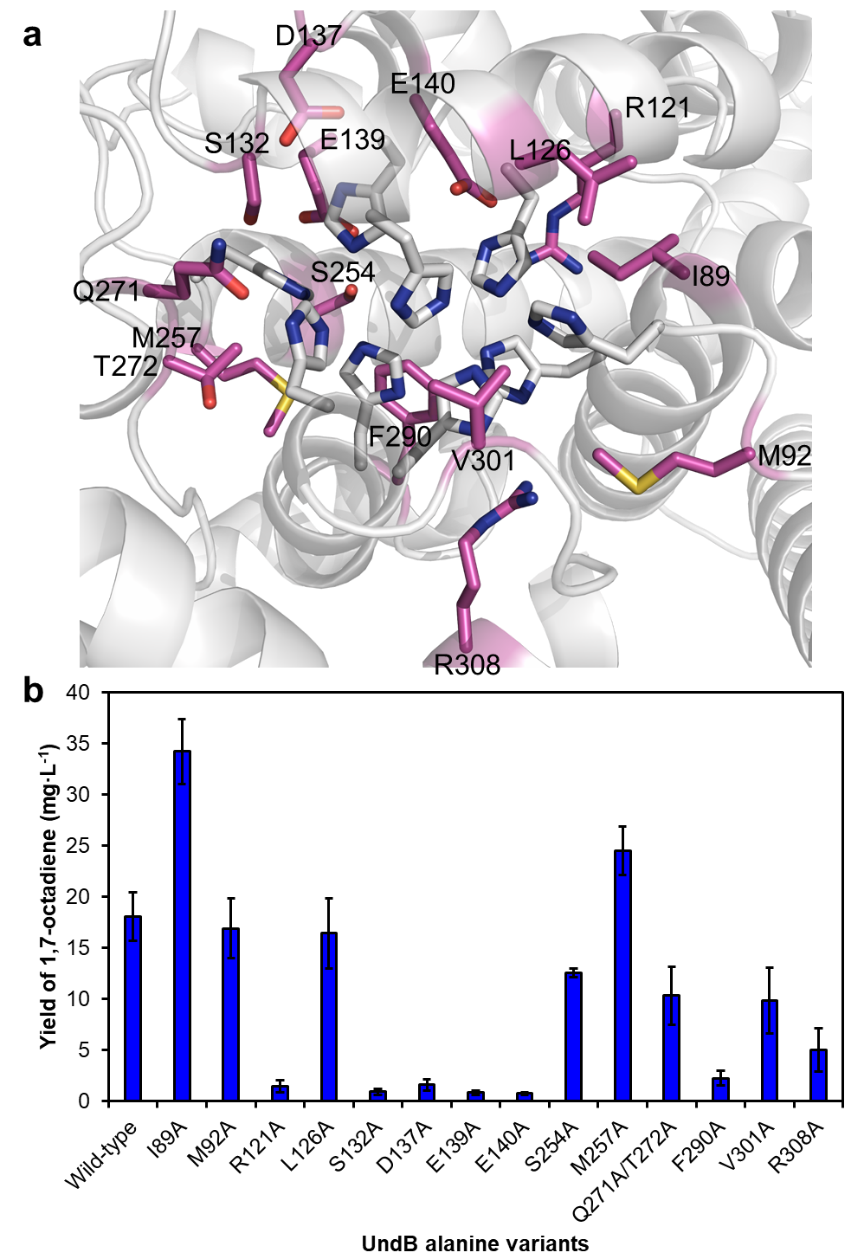


### Figure S10 Alanine scan of fifteen amino acid residues of UndB decarboxylase. a AlphaFold-predicted structure of UndB from Pseudomonas mendocina ymp (AF-A4YOK1-F1)12. The nine histidine residues that lie in the proximity the di-iron cofactor are displayed in blue. The fifteen residues (I89, M92, R121, L126, S132, D137, E139, E140, S254, M257, Q271, T272, F290A, V301, and R308) within 5 Å of the histidine residues are displayed in magenta. b Activity of the UndB alanine-substituted variants for the production of 1,7-octadiene (100 μL total volume, MOPS buffer (50 mM), UndB (whole-cell, OD600 = 25), C10 diacid (1 mM), FeCl3 (0.2 mM), glucose (1% w/w), NaCl (154 mM), pH 7.4, incubation: 25 °C, 250 rpm, 4 h). The reactions were performed in triplicate and the standard deviations are displayed. For a numerical summary of panel b, see Table S17.


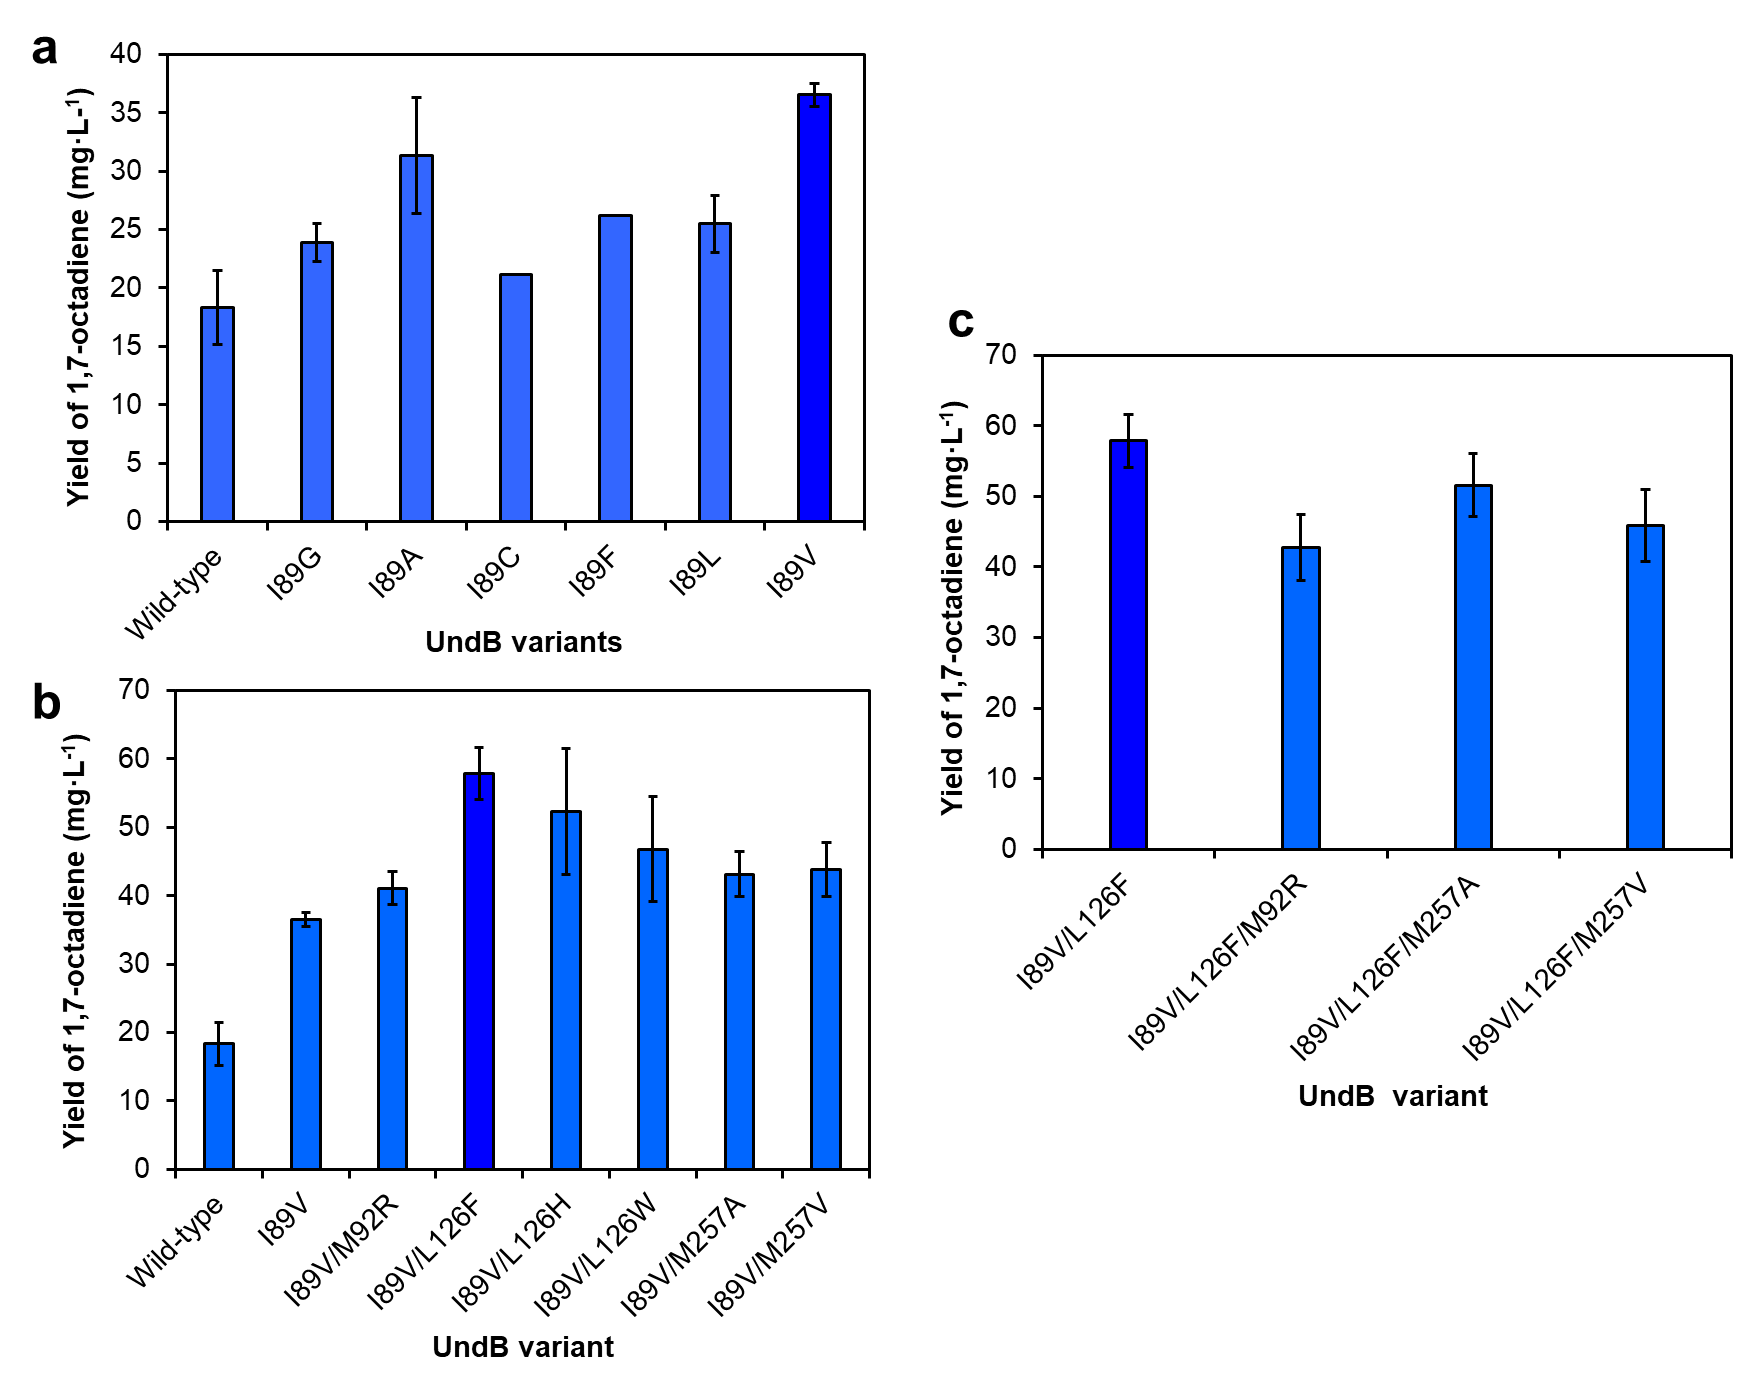


***Figure S11*** *Screening of the site-saturation mutagenesis libraries (SSM) of UndB.* ***a*** *Activities of variants from the UndB 89_SSM library for the production of 1,7-octadiene.* ***b*** *Activity of variants from the UndB (I89V) 92_SSM, 126_SSM, 254_SSM, and 257_SSM libraries for the production of 1,7-octadiene.* ***c*** *Activity of the recombined variants (based on I89V/L126F) for the production of 1,7-octadiene (100 μL total volume, MOPS buffer (50 mM), UndB (whole-cell, OD600 = 25),* ***C10 diacid*** *(1 mM), FeCl3 (0.2 mM), glucose (1% w/w), NaCl (154 mM), pH 7.4, incubation: 25 °C, 250 rpm, 4 h). The reactions were performed in triplicate (except UndB variant I89C and I89F in panel* ***a****) and the standard deviations are displayed. For a numerical summary of panels* ***a****,* ***b****, and* ***c****, see* ***Table S18****.*


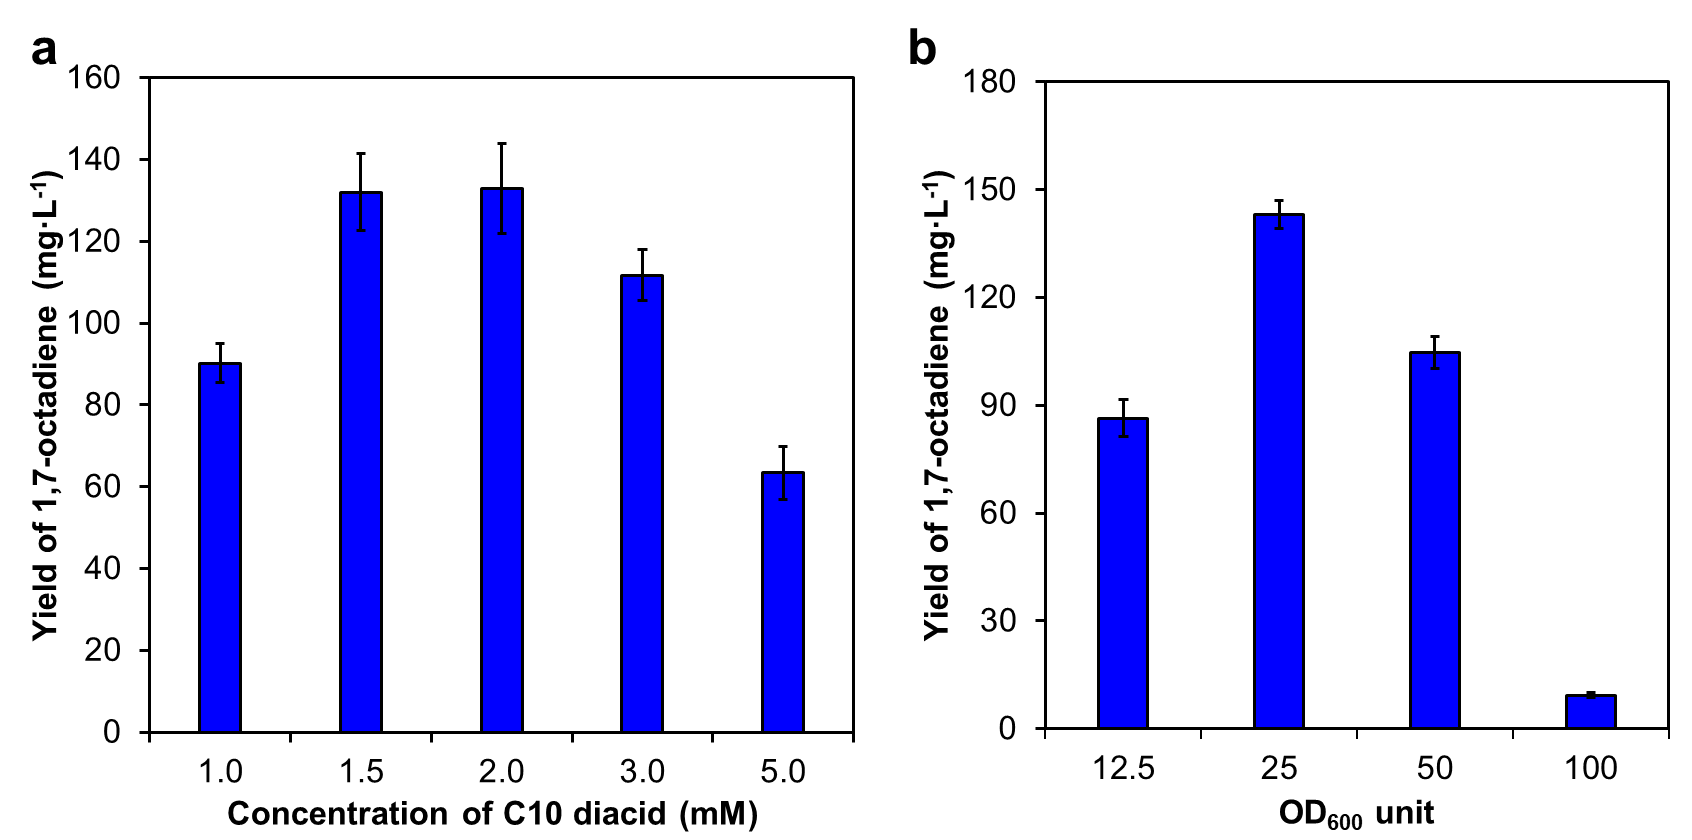


### Figure S12 Optimization of 1,7-octadiene production by varying the catalyst and substrate concentrations. a Variation of [C10 diacid]. b Variation of [UndB I89V/L126F] (in whole-cell). (Both Figures: 100 μL total volume, MOPS buffer (50 mM)), UndB I89V/L126F (whole-cell, OD600 = 25 or as specified in the Figure), ([C10 diacid] = 2 mM or as specified in the Figure), FeCl3 (0.2 mM), glycerol (0.5% v/v), NaCl (154 mM), pH 7.4, incubation: 25 °C, 250 rpm, 4 h). The reactions were performed in triplicate and the standard deviations are displayed. For a numerical summary of panels a and b, see Table S19.


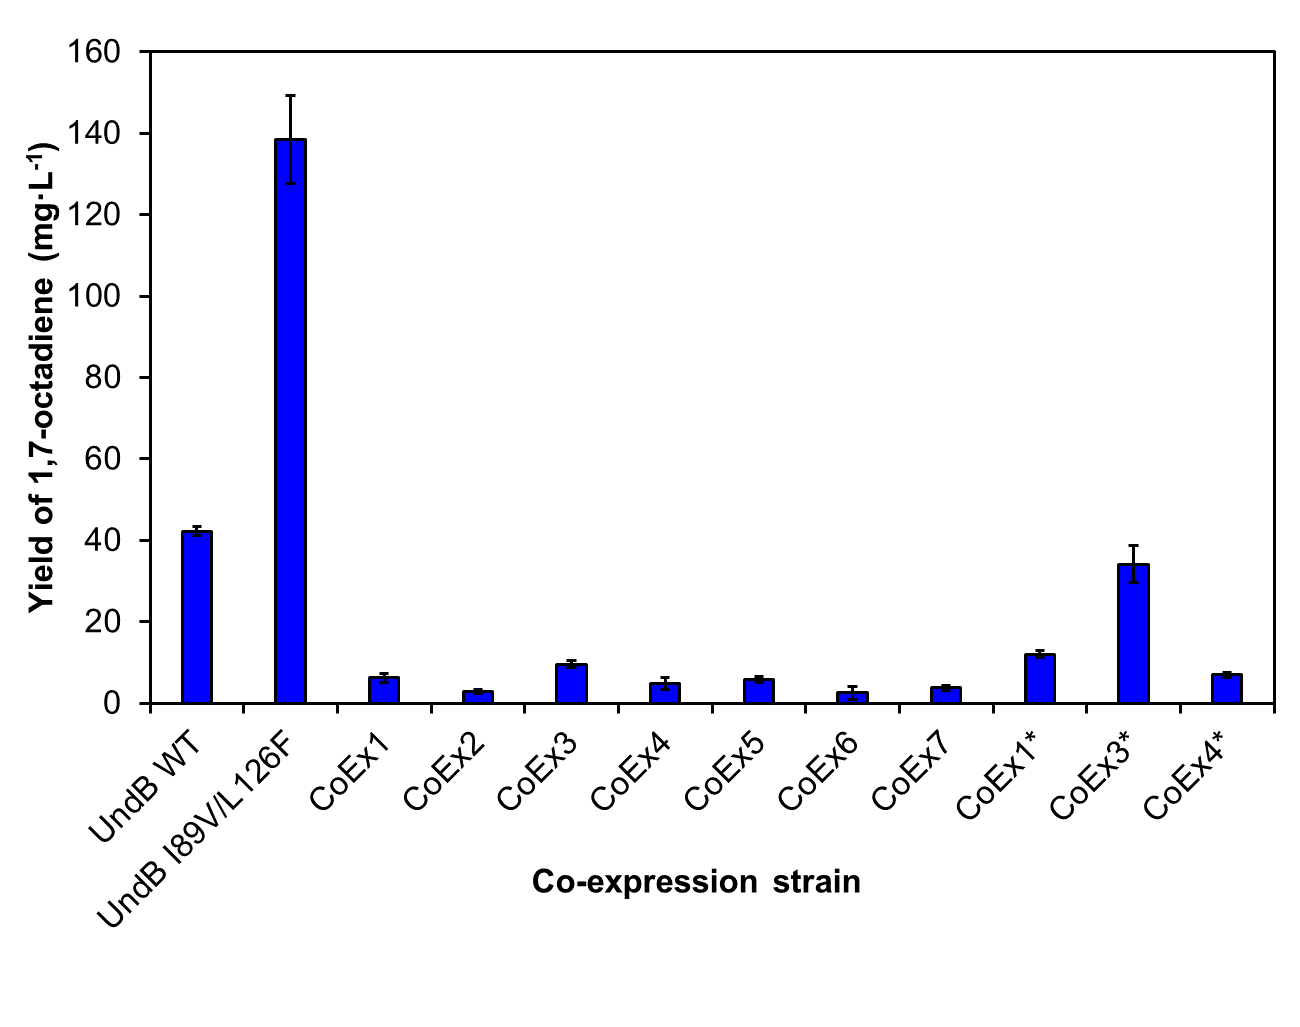
***Figure S13*** *Production of 1,7-ocatadiene by the co-expression strains (see* ***Table S8****) (100 μL total volume, MOPS buffer (50 mM), co-expression cells (OD600 = 25), [****C10 diacid****] = 2 mM, FeCl3 (0.2 mM), glycerol (0.5% v/v), NaCl (154 mM), pH 7.4, incubation 25 °C, 250 rpm, 4 h). The reactions were performed in triplicate and the standard deviations are displayed. For a numerical summary, see* ***Table S8****.*


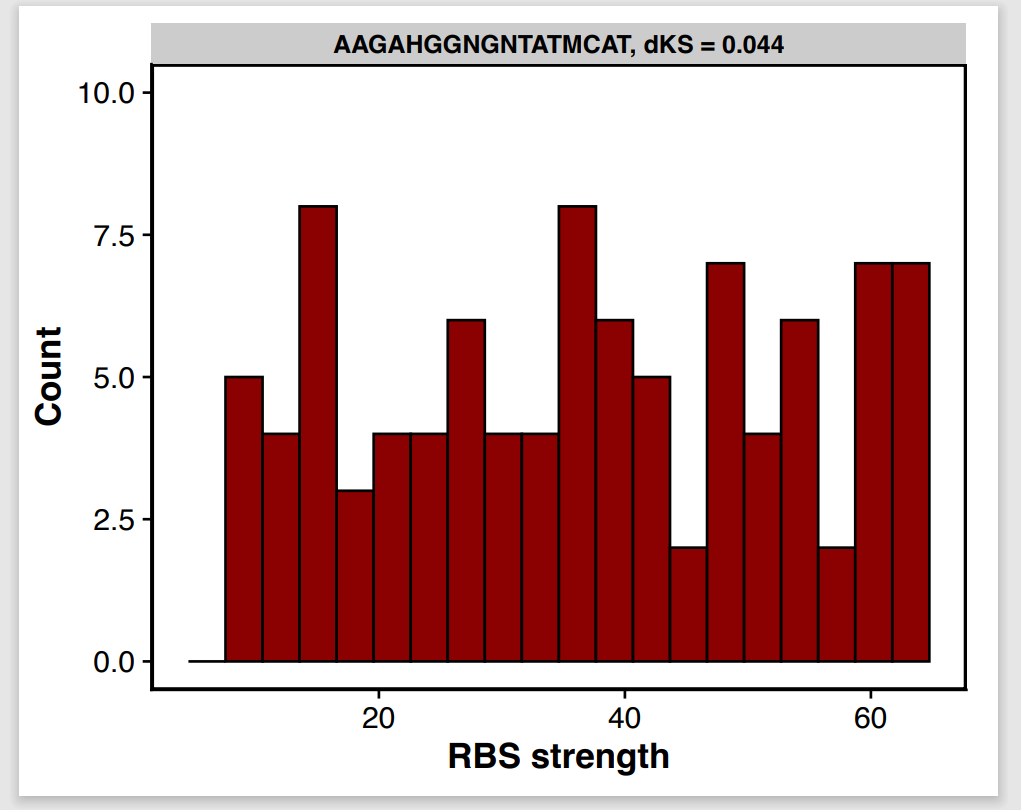


***Figure S14*** *Histogram of the distribution of RBS strengths after applying the RedLibs algorithm to the large library of RBS strengths. The distribution target is a uniform distribution and the target library size is 96. The dKS (Kolmogorov-Smirnov distance) is used to score how closely the obtained distribution resembles the target distribution. The library with the smallest (best) dKS of 0.044 is displayed and is encoded in the degenerate sequence AAGA****H****GG****N****G****N****TAT****M****CAT.*

*
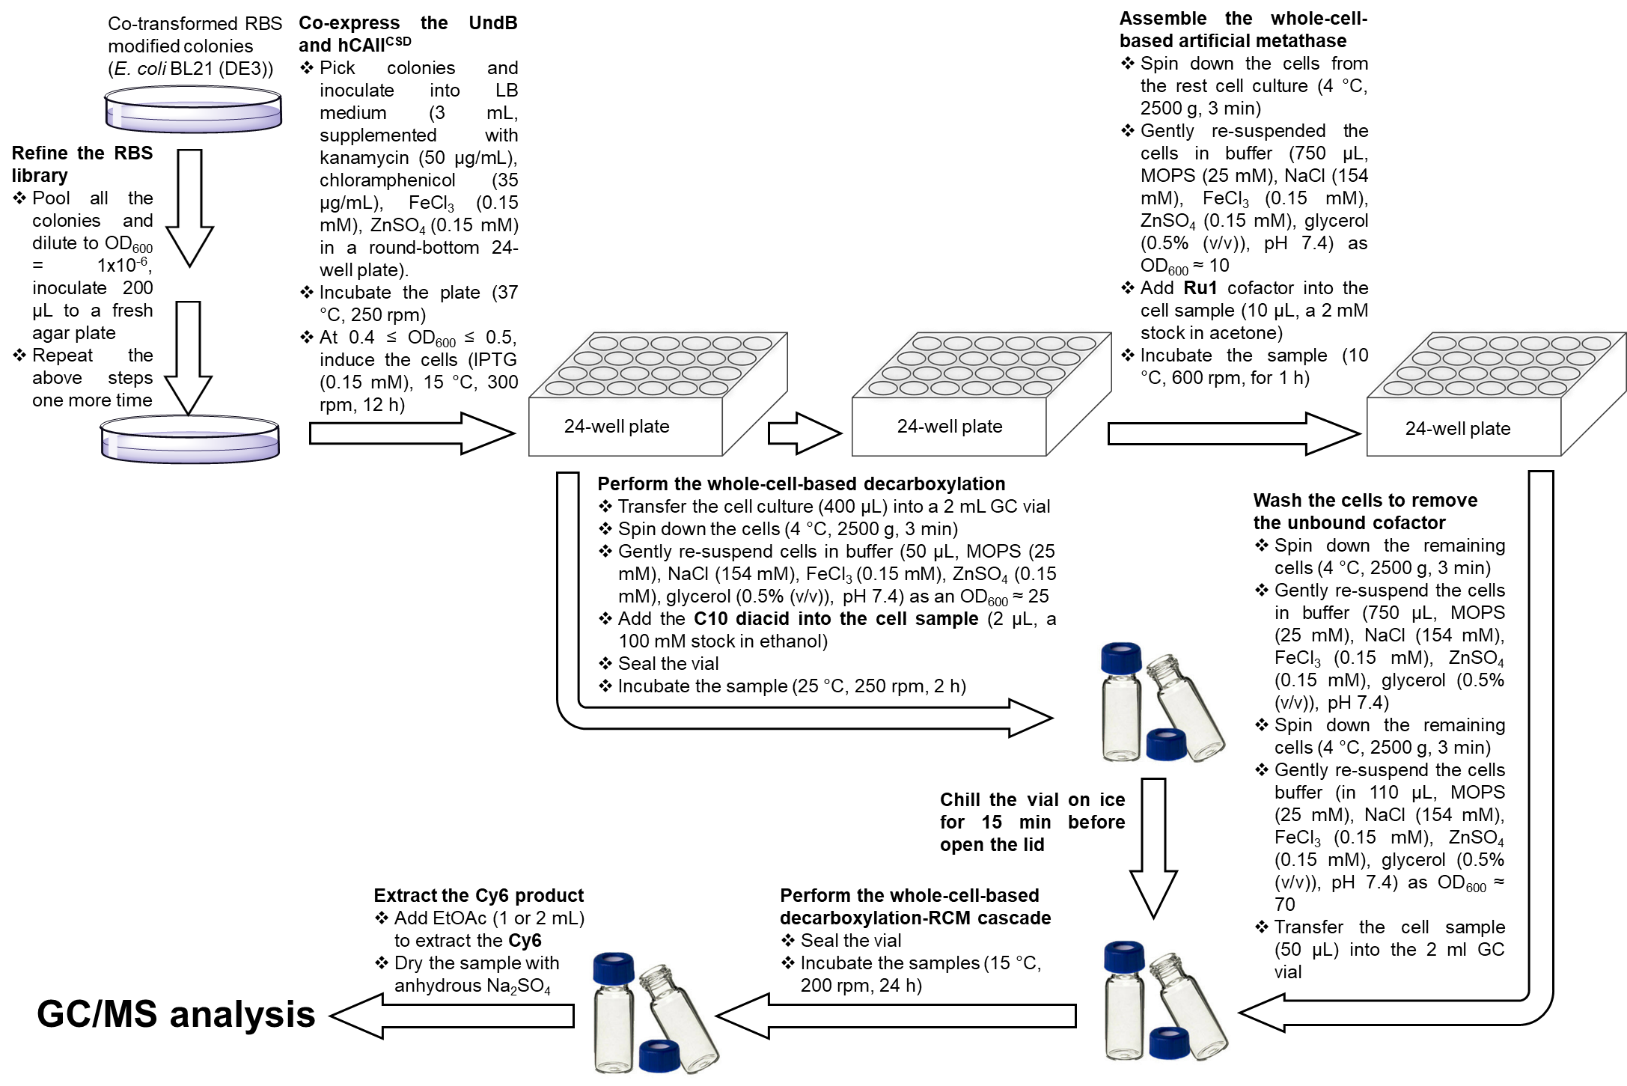
*

***Figure S15*** *Schematic representation of the whole-cell-based assay used for screening of the RBS-optimized library.*


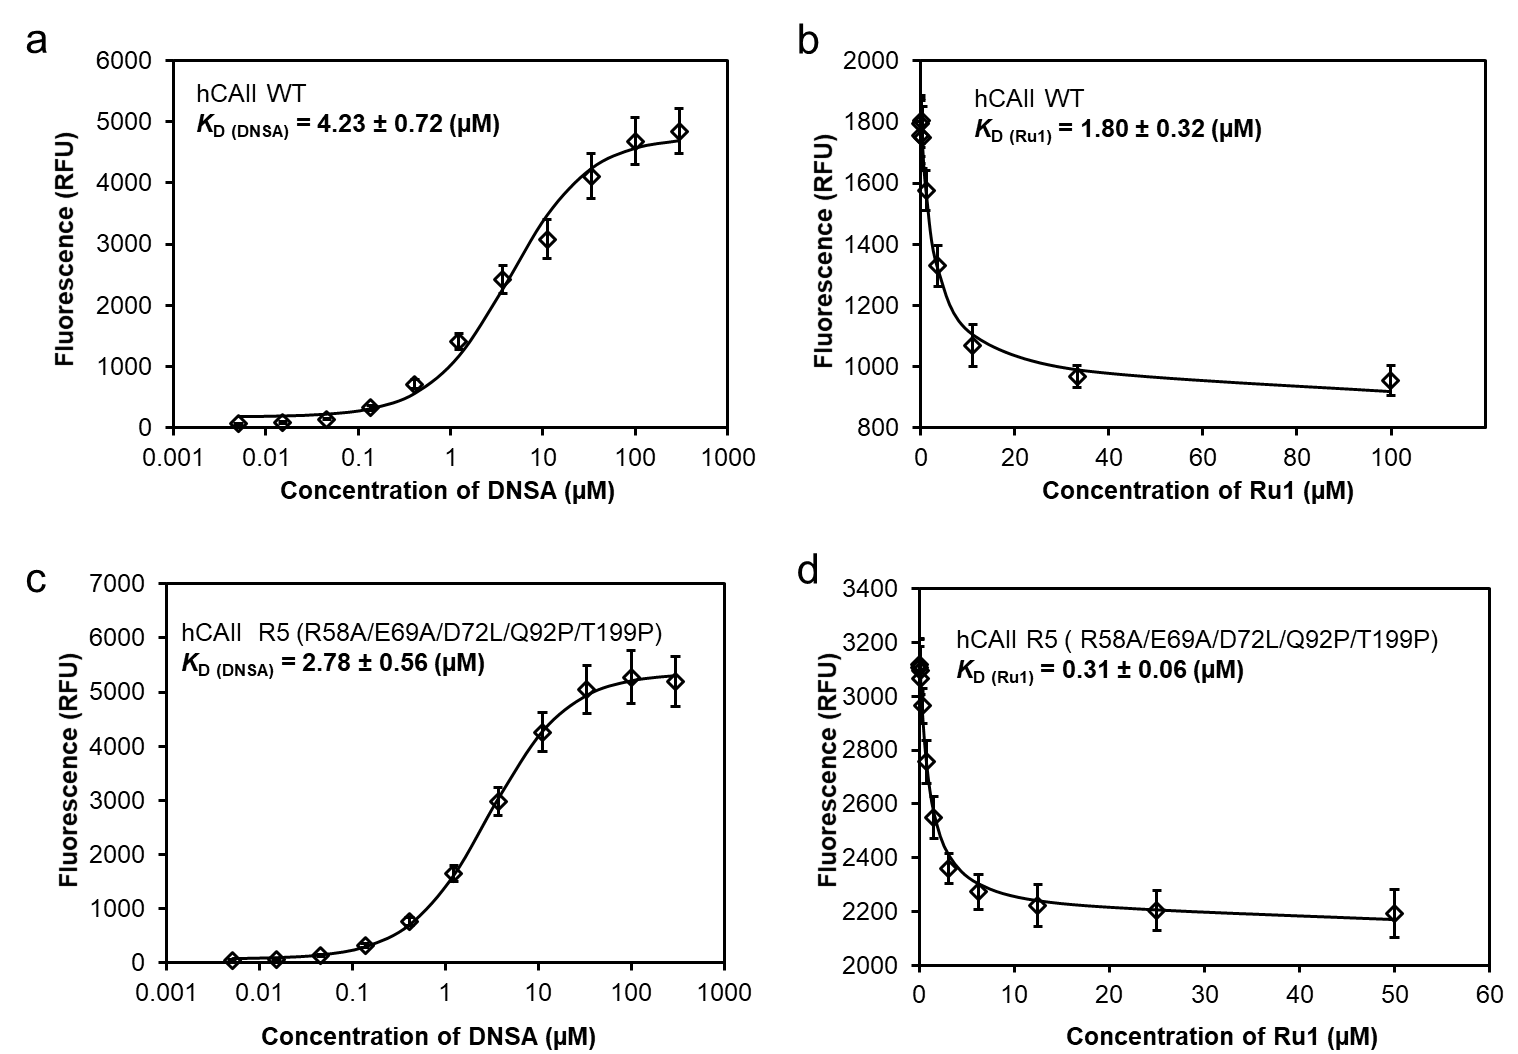


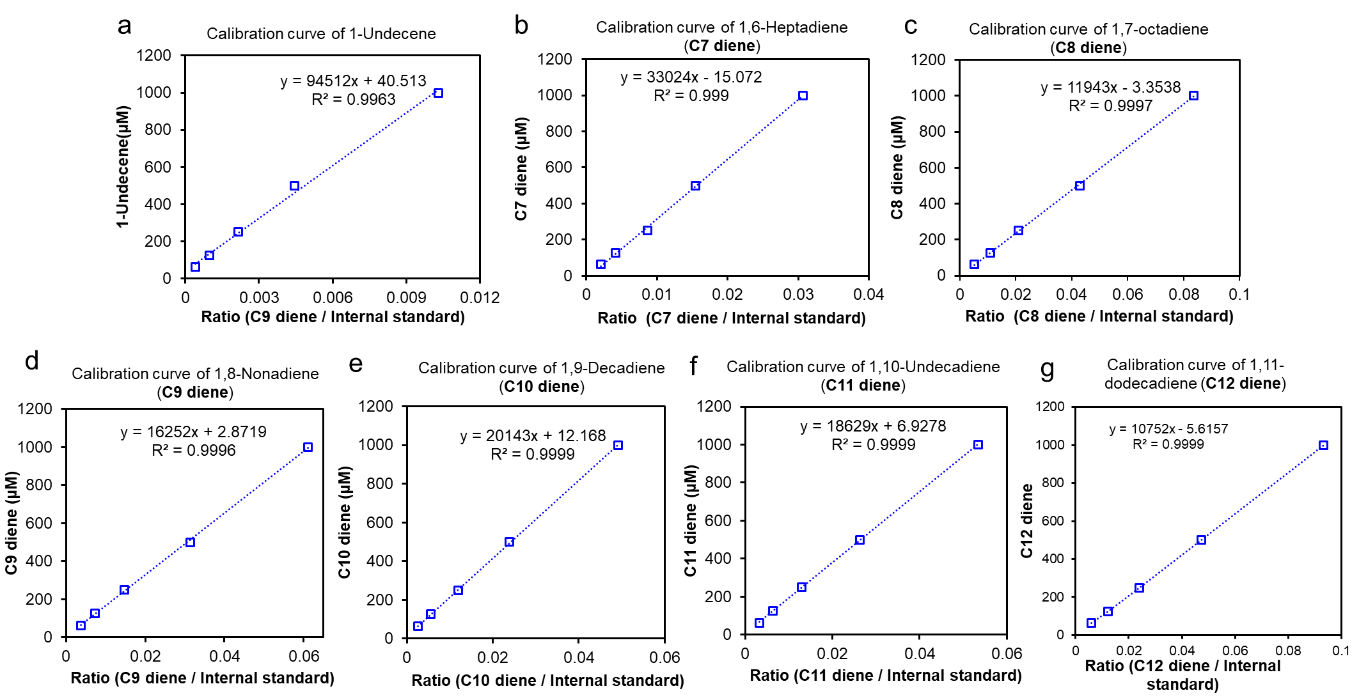
***Figure S16****. Fitted curves for the determination of the KD of hCAII to* ***DNSA*** *and* ***Ru1***.*The titrations were performed in triplicate and the standard deviations are displayed*

Figure S17 Calibration curves of the dienes used for the GC-MS analysis


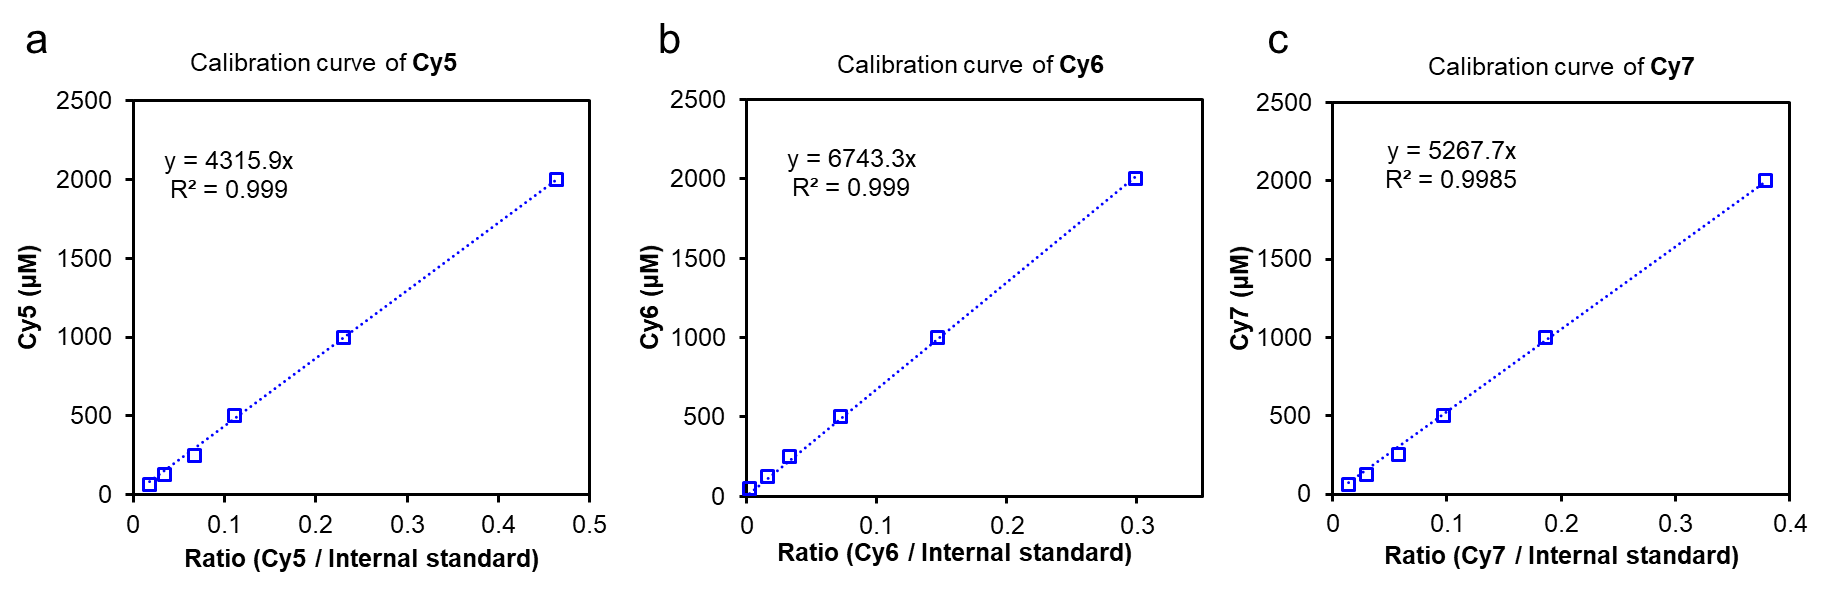


***Figure S18*** *Calibration curves of the cycloalkene products used for the GC-MS analysis*

# Section 3: Supplementary Tables

### Table S1 Strains and cultivation conditions for protein expression.

| **Plasmid / *E. coli* strain** | **Main culture/ antibiotic** | **Expression conditions** |
| --- | --- | --- |
| pRSF-hCAIICSD (WT and libraries) LEMO21(DE3) | LB medium supplemented with ZnSO4 (0.5 mM) / Kanamycin (50 μg/mL) | IPTG (0.5 mM) / 20 °C, 180 rpm for 18 hours(50 mL main culture in 250 mL baffled shaking flask) |
| pRSF-hCAII (cytoplasmic, WT and variants) / BL21(DE3) | LB supplemented with ZnSO4 (0.5 mM) / Kanamycin (50 μg/mL) | IPTG (0.25 mM) / 20 °C, 120 rpm for 24 hours (1L main culture in 5 L baffled shaking flask) |
| pRSF-UndB (WT and variants) / BL21(DE3) | LB supplemented with FeCl3 (0.2 mM) / Kanamycin (50 μg/mL) | IPTG (0.15 mM) / 16 °C, 180 rpm for 10 hours (30 mL main culture in 250 mL baffled shaking flask) |
| pRSF-UndB/pACYC-hCAIICSD (CoEx3 or CoEx3*) / BL21(DE3) | LB supplemented with FeCl3 (0.2 mM), ZnSO4 (0.2 mM) / Kanamycin (50 μg/mL), chloramphenicol (35 μg/mL) | IPTG (0.15 mM) / 16 °C, 180 rpm for 10 hours (30 mL main culture in 250 mL baffled shaking flask) |

### ***Table S2*** *Primers used for engineering* hCAIICSD.

| **Name of primer** | **Sequence (5'-3')** |
| --- | --- |
| Fw R58A-hCAIICSD | CAACTTCCCTGGCGATCCTCAACAATG |
| Fw R58F-hCAIICSD | CAACTTCCCTGTTTATCCTCAACAATG |
| Fw R58G-hCAIICSD | CAACTTCCCTGGGTATCCTCAACAATG |
| Fw R58I-hCAIICSD | CAACTTCCCTGATTATCCTCAACAATG |
| Fw R58L-hCAIICSD | CAACTTCCCTGCTGATCCTCAACAATG |
| Fw R58P-hCAIICSD | CAACTTCCCTGCCGATCCTCAACAATG |
| Fw R58V-hCAIICSD | CAACTTCCCTGGTGATCCTCAACAATG |
| Rev R58-hCAIICSD general | AGGGAAGTTGCTTGATCATAGGA |
| Fw N62A-hCAIICSD | AGGATCCTCAACGCTGGTCATGCTTTCAAC |
| Fw N62F-hCAIICSD | AGGATCCTCAACTTTGGTCATGCTTTCAAC |
| Fw N62G-hCAIICSD | AGGATCCTCAACGGTGGTCATGCTTTCAAC |
| Fw N62I-hCAIICSD | AGGATCCTCAACATTGGTCATGCTTTCAA |
| Fw N62L-hCAIICSD | AGGATCCTCAACCTTGGTCATGCTTTCAAC |
| Fw N62P-hCAIICSD | AGGATCCTCAACCCTGGTCATGCTTTCAAC |
| Fw N62V-hCAIICSD | AGGATCCTCAACGTTGGTCATGCTTTCAAC |
| Rev N62/H64-hCAIICSD general | GTTGAGGATCCTCAGGGAAGTTG |
| Fw H64A-hCAIICSD | GATCCTCAACAATGGTGCTGCTTTCAACGTG |
| Fw H64F-hCAIICSD | GATCCTCAACAATGGTTTTGCTTTCAACGTG |
| Fw H64G-hCAIICSD | GATCCTCAACAATGGTGGTGCTTTCAACGTG |
| Fw H64I-hCAIICSD | GATCCTCAACAATGGTATTGCTTTCAACGTG |
| Fw H64L-hCAIICSD | GATCCTCAACAATGGTCTTGCTTTCAACGTG |
| Fw H64P-hCAIICSD | GATCCTCAACAATGGTCCTGCTTTCAACGTG |
| Fw H64V-hCAIICSD | GATCCTCAACAATGGTGTTGCTTTCAACGTG |
| Fw N67A-hCAIICSD | GTCATGCTTTCGCCGTGGAGTTTGATG |
| Fw N67F-hCAIICSD | GTCATGCTTTCTTCGTGGAGTTTGATG |
| Fw N67G-hCAIICSD | GTCATGCTTTCGGCGTGGAGTTTGATG |
| Fw N67I-hCAIICSD | GTCATGCTTTCATCGTGGAGTTTGATG |
| Fw N67L-hCAIICSD | GTCATGCTTTCCTCGTGGAGTTTGATG |
| Fw N67P-hCAIICSD | GTCATGCTTTCCCCGTGGAGTTTGATG |
| Fw N67V-hCAIICSD | GTCATGCTTTCGTCGTGGAGTTTGATG |
| Rev N67/E69-hCAIICSD general | GAAAGCATGACCATTGTTGAGGATCC |
| Fw E69A-hCAIICSD | GTCATGCTTTCAACGTGGCGTTTGATGACTC |
| Fw E69F-hCAIICSD | GTCATGCTTTCAACGTGTTTTTTGATGACTC |
| Fw E69G-hCAIICSD | GTCATGCTTTCAACGTGGGGTTTGATGACTC |
| Fw E69I-hCAIICSD | GTCATGCTTTCAACGTGATTTTTGATGACTC |
| Fw E69L-hCAIICSD | GTCATGCTTTCAACGTGTTGTTTGATGACTC |
| Fw E69P-hCAIICSD | GTCATGCTTTCAACGTGCCGTTTGATGACTC |
| Fw E69V-hCAIICSD | GTCATGCTTTCAACGTGGTTTTTGATGACTC |
| Fw D72A-hCAIICSD | GAGTTTGATGCCTCTCAGGACAAAGC |
| Fw D72F-hCAIICSD | GAGTTTGATTTCTCTCAGGACAAAGC |
| Fw D72G-hCAIICSD | GAGTTTGATGGATCTCAGGACAAAGC |
| Fw D72I-hCAIICSD | GAGTTTGATATCTCTCAGGACAAAGC |
| Fw D72L-hCAIICSD | GAGTTTGATCTCTCTCAGGACAAAGC |
| Fw D72P-hCAIICSD | GAGTTTGATCCCTCTCAGGACAAAGC |
| Fw D72V-hCAIICSD | GAGTTTGATGTCTCTCAGGACAAAGC |
| Rev D72-hCAIICSD general | TCAAACTCCACGTTGAAAGCAG |
| Fw E69A/D72A-hCAIICSD | GCGTTTGATGCCTCTCAGGACAAAGC |
| Fw E69A/D72F-hCAIICSD | GCGTTTGATTTCTCTCAGGACAAAGC |
| Fw E69A/D72G-hCAIICSD | GCGTTTGATGGATCTCAGGACAAAGC |
| Fw E69A/D72I-hCAIICSD | GCGTTTGATATCTCTCAGGACAAAGC |
| Fw E69A/D72L-hCAIICSD | GCGTTTGATCTCTCTCAGGACAAAGC |
| Fw E69A/D72V-hCAIICSD | GCGTTTGATGTCTCTCAGGACAAAGC |
| Rev E69A/D72-hCAIICSD general | TCAAACGCCACGTTGAAAGCAG |
| Fw PelB-INPN truncated | ATGGGTCATCACCATCATCATCACTGGGGGTAC |
| Rev PelB-INPN truncated | ATGATGGTGATGACCCATGGTATATCTCCTTATTAAA |

### ***Table S3*** *Primers used for engineering UndB.*

| **Name of primer** | **Sequence (5'-3')** |
| --- | --- |
| Fw UndB I89A | GATCTGGCTCATAGCATGTATTTTCG |
| Rev UndB I89A | GCTATGAGCCAGATCATGTTCCAGT |
| Fw UndB M92A | CATAGCGCGTATTTTCGTAAACAGCC |
| Rev UndB M92A | GAAAATACGCGCTATGAATCAGATCA |
| Fw UndB R121A | TGGGTGGCCCGTCATCTGC |
| Rev UndB R121A | ACGGGCCACCCACGGATTAAT |
| Fw UndB L126A | CATCTGCATGCGAATCATCATAAAG |
| Rev UndB L126A | GATTCGCATGCAGATGACGG |
| Fw UndB S132A | TCATAAAGTGGCCGGTAGTGAAG |
| Rev UndB S132A | CTTCACTACCGGCCACTTTATGA |
| Fw UndB D137A | AAGCCGCTATGGAAGAACGCGCCA |
| Rev UndB D137A | CTTCCATAGCGGCTTCACTACCGC |
| Fw UndB E139A | GATATGGCAGAACGCGCCATTACCA |
| Rev UndB E139A | GCGTTCTGCCATATCGGCTTCACTAC |
| Fw UndB E140A | TATGGAAGCACGCGCCATTACCAATG |
| Rev UndB E140A | GCGTGCTTCCATATCGGCTTCACTAC |
| Fw UndB S254A | TTTGTGGCTAGCAATATGCATTATTACG |
| Rev UndB S254A | TGCTAGCCACAAAATGCAGAC |
| Fw UndB M257A | AGCAATGCGCATTATTACGGCGATGT |
| Rev UndB M257A | AATAATGCGCATTGCTACTCACAAAATG |
| Fw UndB Q271A/T272A | CAGGCGGCCCAGGTTCTGAAT |
| Rev UndB Q271A/T272A | CCTGGGCCGCCTGAATCACATTAC |
| Fw UndB F290A | TTAATGCTGGTAGCAGTCATGCAA |
| Rev UndB F290A | CTACCAGCATTAAAACAAAATGCTTGC |
| Fw UndB V301A | TTTTGTGGCTAAAGAACCGTTTTATATC |
| Rev UndB V301A | TTCTTTAGCCACAAAATGATGAATTGC |
| Fw UndB R308A | TTATATCGCCCAGCTGACCGTTCCG |
| Rev UndB R308A | AGCTGGGCGATATAAAACGGTTCTTTAAC |
| Fw UndB NNK89 | TAGGTCTCTATCTGNNKCATAGCATGTATTTTC |
| Rev UndB NNK89 | ATGGTCTCAAGATCATGTTCCAGTTCATG |
| Fw UndB NNK92 | TAGGTCTCTATAGCNNKTATTTTCGTAAACAG |
| Rev UndB NNK92 (I89V) | ATGGTCTCACTATGAACCAGATCATGTTCCA |
| Fw UndB NNK126 | TAGGTCTCACTGCATNNKAATCATCATAAAGTG |
| Rev UndB NNK126 | TAGGTCTCAGCAGATGACGGCGC |
| Fw UndB NNK254 | TAGGTCTCATTGTGNNKAGCAATATGCATT |
| Rev UndB NNK254 | TAGGTCTCTACAAAATGCAGACAAAAG |
| Fw UndB NNK257 | TAGGTCTCAAGCAATNNKCATTATTACGGC |
| Rev UndB NNK257 | TAGGTCTCATGCTACTCACAAAATGCAG |

### Table S4 Numerical summary of Figure 2a. In vitro RCM of 1,7-octadiene using different concentrations of Ru1 or Ru1·hCAII WT. Effect of the Ru1 cofactor concentration on turnover number. The reactions with Ru1 were performed in triplicate. The reactions with Ru1·hCAII WT were performed in nine ([Ru1] = 7.5 or 60 μM), eighteen ([Ru1] = 15 μM) and twelve replicates ([Ru1] = 30 μM), respectively. Standard deviations are displayed.

| **Ru1·hCAII** | **Ru1 (μM)** | **Turnover number (TON)** |
| --- | --- | --- |
| **Ru1** | 7.5  15  30  60 | 5.3 ± 3.2  12.2 ± 2.3  25.1 ± 4.6  24.1 ± 3.6 |
| **Ru1·**hCAII WT | 7.5  15  30  60 | 14.0 ± 7.0  23.4 ± 5.2  42.0 ± 5.3  35.5 ± 5.5 |

### Table S5 Numerical summary of Figure 3b. The evolutionary trajectory of Ru1·hCAIICSD for the production of Cy6. The reactions were performed in triplicate and the standard deviations are displayed.

| **Evolution round** | **Ru1·hCAIICSD variant (whole-cell)** | **Yield of Cy6 (mg·L-1)** |
| --- | --- | --- |
| **R0**  **R1**  **R2**  **R3**  **R4**  **R5** | WT  E69A  R58A/E69A  R58A/E69A/D72L  R58A/E69A/D72L/Q92P  R58A/E69A/D72L/Q92P/T199P | 13.7 ± 1.3  24.2 ± 4.4  30.3 ± 12.7  38.7 ± 5.4  44.9 ± 4.9  50.3 ± 4.5 |

### Table S6 Numerical summary of Figure 3c. In vitro production of Cy5–7 in the presence of the Ru1 cofactor, the assembled Ru1·hCAIIWT complex and the evolved Ru1·hCAIIR5 artificial metathase (100 μL total volume, MOPS buffer (200 mM), Ru1 (15 μM), purified hCAII (60 μM), 1,6-heptadiene/1,7-octadiene/or 1,8-nonadiene (5 mM), NaCl (154 mM), glucose (1% w/w), ZnSO4 (0.5 mM), pH 7.4, incubation: 20 °C, 150 rpm, 40 h). The reactions were performed in triplicate and the standard deviations are displayed.

| **Ru1·hCAII** | **Yield of cycloalkene (μM)** | **Turnover number (TON)** |
| --- | --- | --- |
| **Ru1** | **Cy6**: 133.5 ± 33.0  **Cy5**: 16.5 ± 9.1  **Cy7**: 18.2 ± 4.5 | 8.9 ± 2.2  1.1 ± 2.2  1.2 ± 0.3 |
| R0 (WT) | **Cy6**: 337.6 ± 59.8  **Cy5**: 91.5 ± 17.8  **Cy7**: 26.8 ± 8.9 | 22.5 ± 4.0  6.1 ± 1.2  1.8 ± 0.6 |
| R5 (R58A/E69A/D72L/Q92P/T199P) | **Cy6**: 488.6 ± 87.3  **Cy5**: 117.5 ± 26.7  **Cy7**: 37.5 ± 10.5 | 32.6 ± 5.8  7.8 ± 1.8  2.5 ± 0.7 |

### Table S7 Numerical summary of Figure 4a. Production of 1.7-octadiene by the UndB variants identified by directed evolution (100 μL total volume, MOPS buffer (50 mM), UndB (whole-cell, OD600 = 25), C10 diacid (1 mM), FeCl3 (0.2 mM), glucose (1% w/w), NaCl (154 mM), pH 7.4, incubation: 25 °C, 250 rpm, 4 h). The reactions were performed in triplicate and the standard deviations are displayed.

| **UndB variant** | **Yield of 1,7-octadiene (mg·L-1)** | **Yield (%)** |
| --- | --- | --- |
| WT | 18.4 ± 3.2 | 16.7 ± 2.9 |
| I89V | 36.5 ± 1.0 | 33.1 ± 0.1 |
| I89V/L126F | 57.9 ± 3.8 | 52.5 ± 3.4 |
| WTa | 43.5 ± 3.9 | 39.5 ± 3.5 |
| I89V/L126Fa | 90.2 ± 4.8 | 81.8 ± 4.4 |

aGlucose (1% (w/w)) was replaced by glycerol (0.5% (v/v))

### Table S8 *E. coli strains used for co-expression of UndB and hCAIICSD. Production of 1,7-ocatadiene by the co-expression strains was determined (100 μL, MOPS buffer (50 mM), co-expression cells (OD600 = 25),* ***C10 diacid*** *(2 mM), FeCl3 (0.2 mM), glycerol (0.5% v/v), NaCl (154 mM), pH 7.4) was performed by incubation (25 °C, 250 rpm, 4 h).*

| **Strain** | | **UndB construct** | **hCAIICSD construct** | **Host** | **Yield of 1,7-octadiene (mg·L-1)** |
| --- | --- | --- | --- | --- | --- |
| UndB WT | pRSF-UndB WT | / | *E. coli* BL21(DE3) | 42.2 ± 1.1 | |
| UndB I89V/L126F | pRSF-UndB I89V/L126F | / | *E. coli* BL21(DE3) | 138.5 ± 10.8 | |
| CoEx1 | pRSF-UndB WT & hCAIICSD WT | pRSF-UndB WT & hCAIICSD WT | *E. coli* BL21(DE3) | 6.3 ± 1.1 | |
| CoEx1* | pRSF-UndB I89V/L126F & hCAIICSD R5 | pRSF-UndB R2 & hCAIICSD R5 | *E. coli* BL21(DE3) | 12.1 ± 0.8 | |
| CoEx2 | pRSF-UndB WT & hCAIICSD WT | pRSF-UndB WT & hCAIICSD WT | *E. coli* LEMO21(DE3) | 2.8 ± 0.5 | |
| CoEx3 | pRSF-UndB WT | pACYC-hCAIICSD WT | *E. coli* BL21(DE3) | 9.6 ± 1.0 | |
| **CoEx3*** | **pRSF-UndB I89V/L126F** | **pACYC-hCAIICSD R5** | ***E. coli* BL21(DE3)** | **34.2 ± 4.6** | |
| CoEx4 | pRSF-UndB WT | pET-11b-hCAIICSD WT | *E. coli* BL21(DE3) | 4.9 ± 1.5 | |
| CoEx4* | pRSF-UndB I89V/L126F | pET-11b-hCAIICSD R5 | *E. coli* BL21(DE3) | 7.0 ± 0.6 | |
| CoEx5 | pRSF-UndB WT | pET-11b-hCAIICSD WT | *E. coli* LEMO21(DE3) | 5.8 ± 0.8 | |
| CoEx6 | pACYC-UndB WT | pRSF-hCAIICSD WT | *E. coli* BL21(DE3) | 2.5 ± 1.5 | |
| CoEx7 | pACYC-UndB WT | pET11b-hCAIICSD WT | *E. coli* BL21(DE3) | 3.8 ± 0.6 | |

### Table S9 Primers used for engineering the ribosome binding sites.

| **Primer** | **Sequence (5'-3')** |
| --- | --- |
| Fw RedLib UndB | AATAHGGNGNTATMCATATGAGCCCGAGCCC |
| Rev RedLib UndB | CATATGKATANCNCCDTATTAAAGTTAAACAAAAT |
| Fw RedLib hCAIICSD | AATAHGGNGNTATMCATATGAAATACCTGCTGCCG |
| Rev RedLib hCAIICSD | CATATGKATANCNCCDTATTAAAGTTAAACAAAATTA |

### Table S10 Numerical summary of Figure 5b–c.Yields of 1,7-octadiene and Cy6 catalyzed by the RBS optimized CoEx3* strains.. The mutations in the RBS of pRSF-UndB I89V/L126F and pACYC-hCAIICSD R5 are highlighted in red. The reactions were performed using the protocol described in Figure S15. The reactions were performed in triplicate and the standard deviations are displayed.

| **Strain** | **Yield of 1,7-octadiene (mg·L-1)** | **Yield of Cy6 (mg·L-1)** | **RBS sequence** |
| --- | --- | --- | --- |
| UndB WT | 42.2 ± 1.1 | / | AATAAGGAGATATAAT (UndB WT) |
| UndB I89V/L126F | 138.5 ± 10.8 | / | AATAAGGAGATATAAT (UndB I89V/L126F) |
| **CoEx3** | **14.5 ± 2.1** | **≤ 0.2** | AATAAGGAGATATAAT (UndB WT)  AATAAGGAGATATAAT (hCAIICSD WT) |
| **CoEx3*** | **44.6 ± 4.9** | **2.6 ± 0.9** | AATAAGGAGATATAAT (UndB I89V/L126F)  AATAAGGAGATATAAT (hCAIICSD R5) |
| **CoEx3* P2_8** | **72.8 ± 5.8** | **6.3 ± 0.8** | AATATGGGGGTATAAT (UndB I89V/L126F)  AATACGGGGCTATCAT (hCAIICSD R5) |
| **CoEx3* P2_23** | **97.7 ± 12.5** | **8.9 ± 1.7** | AATAAGGAGATATAAT (UndB I89V/L126F)  AATACGGCGCTATCAT (hCAIICSD R5) |
| CoEx3* P3_22 | 46.2 ± 7.7 | 3.9 ± 1.4 | AATAAGGGGATATAAT (UndB I89V/L126F)  AATATGGTGCTATAAT (hCAIICSD R5) |
| CoEx3* P3_24 | 67.8 ± 8.2 | 5.6 ± 1.8 | AATAAGGAGATATAAT (UndB I89V/L126F)  AATACGGTGTTATCAT (hCAIICSD R5) |
| CoEx3* P4_18 | 73.4 ± 3.22 | 4.4 ± 1.7 | AATAAGGGGATATAAT (UndB I89V/L126F)  AATACGGCGCTATCAT (hCAIICSD R5) |
| CoEx3* P7_8 | 76.0 ± 3.3 | 4.1 ± 2.1 | AATACGGGGATATAAT (UndB I89V/L126F)  AATACGGCGCTATCAT (hCAIICSD R5) |
| CoEx3* P8_11 | 113.1 ± 3.3 | 5.5 ± 1.4 | AATATGGGGGTATCAT (UndB I89V/L126F)  AATACGGCGCTATCAT (hCAIICSD R5) |
| **CoEx3* P8_15**  **(CoEx3*183)** | **96.6 ± 4.9** | **15.5 ± 1.6** | AATACGGAGATATAAT (UndB I89V/L126F)  AATACGGCGCTATCAT (hCAIICSD R5) |
| CoEx3* P8_16 | 73.3 ± 4.3 | 3.4 ± 1.0 | AATAAGGGGATATAAT (UndB I89V/L126F)  AATAAGGCGGTATCAT (hCAIICSD R5) |

### Table S11 Numerical summary of Figure 5c. Yields of 1,6-heptadiene/1,8-nonadiene and Cy5/7 catalyzed by the pRSF-UndB and pACYC-hCAIICSD co-expression strains. The mutations in the RBS of CoE3* P8_15 (CoEx3*183) are highlighted in red. The reactions were performed in triplicate and the standard deviations are displayed.

| **Strain** | **Yield of diene (mg·L-1)** | **Yield of cycloalkene (mg·L-1)** | **RBS sequence** |
| --- | --- | --- | --- |
| CoEx3 | 1,6-heptadiene:  8.3 ± 1.3 | **Cy5**: trace | AATAAGGAGATATAAT (UndB WT)  AATAAGGAGATATAAT (hCAIICSD WT) |
| CoEx3* | 1,6-heptadiene:  42.1 ± 5.9 | **Cy5**: 0.4 ± 0.2 | AATAAGGAGATATAAT (UndB I89V/L126F)  AATAAGGAGATATAAT (hCAIICSD R5) |
| CoEx3* P8_15 | 1,6-heptadiene:  79.7 ± 8.9 | **Cy5**: 3.1 ± 0.6 | AATACGGAGATATAAT (UndB I89V/L126F)  AATACGGCGCTATCAT (hCAIICSD R5) |
| CoEx3 | 1,8-nonadiene:  11.2 ± 3.3 | **Cy7**: trace | AATAAGGAGATATAAT (UndB WT)  AATAAGGAGATATAAT (hCAIICSD WT) |
| CoEx3* | 1,8-nonadiene:  49.2 ± 5.5 | **Cy7**: trace | AATAAGGAGATATAAT (UndB I89V/L126F)  AATAAGGAGATATAAT (hCAIICSD R5) |
| CoEx3* P8_15 | 1,8-nonadiene:  99.6 ± 12.2 | **Cy7**: 1.1 ± 0.4 | AATACGGAGATATAAT (UndB I89V/L126F)  AATACGGCGCTATCAT (hCAIICSD R5) |

### Table S12 Numerical summary of Figure S2. Fluorescence labeling of the E. coli cells equipped with hCAIICSD WT). The labeling experiment was performed in triplicate and the standard deviations are displayed.

| **Strain** | **Fluorescence signal (RFU)** |
| --- | --- |
| Empty vector (pRSF-Duet1)  hCAIICSD WT (pRSF-PelB-INPN-hCAII wild-type) | 114 ± 2  2018 ± 140 |

***Table S13*** *Numerical summary of* ***Figure S3****. pH-dependent activity profiles of UndB WT (in whole-cell) and* ***Ru1****·hCAIICSD WT (in whole-cell). The reactions were performed in triplicate and the standard deviations are displayed.*

| **Enzyme (in whole-cell)** | **pH** | **Relative activity (%)** |
| --- | --- | --- |
| UndB WT | 6.0  6.5  7.0  7.5  8.0 | 9.9 ± 2.2  16.4 ± 6.3  49.8 ± 9.2  100.0 ± 18.2  75.3 ± 5.3 |
| hCAIICSD WT | 6.5  7.0  7.5  8.0 | 100.0 ± 21.6  83.4 ± 4.5  71.1 ± 3.2  72.7 ± 7.5 |

### Table S14 Numerical summary of Figure S4. Optimization of Ru1 loading and incubation temperature for the production of Cy6. The reactions were performed in triplicate and the standard deviations are displayed.

| **Strain** | **Ru1 (μM)** | **Temperature of RCM (°C)** | **Yield of Cy6 (mg·L-1)** |
| --- | --- | --- | --- |
| Empty vector (pRSF-Duet1) | 2  5  10  20 | 25  25  25  25 | Trace  0.02 ± 0.01  0.68 ± 0.21  4.72 ± 1.53 |
| hCAIICSD WT  (pRSF-PelB-INPN-hCAII wild-type) | 2  5  10  20 | 25  25  25  25 | 0.25 ± 0.04  4.75 ± 1.53  10.01 ± 0.81  13.3 ± 0.66 |
|  | 10  10  10 | 20  25  30 | 13.87 ± 0.83  10.22 ± 1.16  8.33 ± 0.74 |

### Table S15 Numerical summary of Figure S6b–c–d. Activity of the Ru1·hCAIICSD R3 92_SSM, 198_SSM, and 199_SSM colonies in the production of Cy6. The high-performing colonies subjected to sequencing are highlighted in bold.

| **Colony** | **Yield of Cy6 (mg·L-1) (SSM_92)** | **Sequenced**  **colony** | **Yield of Cy6 (mg·L-1) (SSM_198)** | **Sequence**  **colony** | **Yield of Cy6 (mg·L-1) (SSM_199)** | **Sequenced**  **colony** |
| --- | --- | --- | --- | --- | --- | --- |
| Parent hCAIICSD R3 | 34.4 ± 6.3 |  | 29.0 ± 14.2 |  | 26.6 ± 13.8 |  |
| A4 | 31.7 |  | 39.1 |  | 27.3 |  |
| A5 | **70.1** | **R3_Q92P** | 43.2 |  | 8.7 |  |
| A6 | 31.5 |  | 34.6 |  | 44.0 |  |
| A7 | 51.9 |  | 54.1 |  | 7.9 |  |
| A8 | 20.6 |  | **60.2** | **R3** | 30.1 |  |
| A9 | 41.7 |  | 46.3 |  | 12.8 |  |
| A10 | 43.8 |  | 39.8 |  | 46.8 |  |
| A11 | 20.2 |  | 50.3 |  | 14.8 |  |
| A12 | 62.1 |  | 49.7 |  | 2.0 |  |
| B1 | 35.1 |  | 28.2 |  | 21.3 |  |
| B2 | 42.9 |  | 26.2 |  | 18.2 |  |
| B3 | 22.6 |  | 43.3 |  | 12.0 |  |
| B4 | 37.9 |  | 44.9 |  | 42.5 |  |
| B5 | 29.4 |  | 32.6 |  | 14.4 |  |
| B6 | 29.4 |  | 28.6 |  | 30.0 |  |
| B7 | 14.5 |  | **56.2** | **R3** | 45.5 |  |
| B8 | 50.4 |  | 43.2 |  | **62.1** | **R3_T199P** |
| B9 | **77.2** | **R3_Q92P** | 37.8 |  | 34.5 |  |
| B10 | 23.8 |  | 20.4 |  | 8.2 |  |
| B11 | 24.7 |  | 43.5 |  | 22.6 |  |
| B12 | 12.8 |  | 47.3 |  | 5.4 |  |
| C1 | 56.8 |  | 25.3 |  | 23.0 |  |
| C2 | 30.0 |  | 27.1 |  | 16.5 |  |
| C3 | 24.4 |  | 42.1 |  | 11.6 |  |
| C4 | 34.7 |  | 38.4 |  | 15.8 |  |
| C5 | 15.5 |  | 25.5 |  | 7.7 |  |
| C6 | 19.5 |  | 33.2 |  | 40.7 |  |
| C7 | 29.8 |  | 0.4 |  | **59.0** | **R3_T199P** |
| C8 | 23.9 |  | 48.7 |  | 21.9 |  |
| C9 | 22.2 |  | 37.9 |  | 3.8 |  |
| C10 | 19.1 |  | 25.5 |  | 11.3 |  |
| C11 | 13.5 |  | 30.4 |  | 0.5 |  |
| C12 | 20.0 |  | 48.9 |  | 12.2 |  |
| D1 | 9.9 |  | 10.5 |  | 3.6 |  |
| D2 | 16.7 |  | 18.3 |  | 10.4 |  |
| D3 | 24.6 |  | 23.0 |  | 1.9 |  |
| D4 | 24.6 |  | 25.3 |  | 30.3 |  |
| D5 | 13.1 |  | 32.0 |  | 24.1 |  |
| D6 | 25.1 |  | 26.0 |  | 29.8 |  |
| D7 | 46.8 |  | 21.8 |  | 9.6 |  |
| D8 | 16.3 |  | 31.9 |  | 6.2 |  |
| D9 | 10.8 |  | 23.4 |  | **92.1** | **R3_T199H** |
| D10 | 36.7 |  | 26.2 |  | 4.2 |  |
| D11 | 25.8 |  | 38.1 |  | 17.3 |  |
| D12 | 12.7 |  | 41.0 |  | 7.8 |  |
| E1 | 8.4 |  | 24.2 |  | 1.0 |  |
| E2 | 32.9 |  | 30.5 |  | 10.8 |  |
| E3 | 42.5 |  | 21.4 |  | 14.5 |  |
| E4 | 34.4 |  | **50.7** | **R3** | 13.2 |  |
| E5 | 18.9 |  | 27.1 |  | 26.6 |  |
| E6 | 8.8 |  | 26.1 |  | 41.3 |  |
| E7 | 28.9 |  | 27.5 |  | 38.2 |  |
| E8 | 35.7 |  | 33.0 |  | 10.0 |  |
| E9 | 34.6 |  | 23.5 |  | 35.9 |  |
| E10 | 15.9 |  | 30.0 |  | 18.2 |  |
| E11 | 13.0 |  | 45.1 |  | 9.4 |  |
| E12 | 17.0 |  | 43.2 |  | 5.0 |  |
| F1 | 13.4 |  | 24.2 |  | 6.5 |  |
| F2 | 61.6 |  | 26.2 |  | 13.2 |  |
| F3 | 31.4 |  | 40.1 |  | 18.8 |  |
| F4 | 15.1 |  | 36.0 |  | 19.2 |  |
| F5 | **98.2** | **R3_Q92P** | 19.6 |  | 8.7 |  |
| F6 | 12.8 |  | 27.4 |  | 27.4 |  |
| F7 | 13.3 |  | 23.8 |  | 23.4 |  |
| F8 | 10.8 |  | 30.0 |  | 28.4 |  |
| F9 | 24.1 |  | 24.5 |  | 13.2 |  |
| F10 | 21.0 |  | 36.3 |  | 0.8 |  |
| F11 | 6.5 |  | 45.0 |  | 14.3 |  |
| F12 | 23.3 |  | 47.7 |  | **74.8** | **R3_T199P** |
| G1 | 23.2 |  | 16.9 |  | 8.4 |  |
| G2 | 21.6 |  | 18.5 |  | 37.4 |  |
| G3 | 23.0 |  | 27.4 |  | 43.0 |  |
| G4 | 20.0 |  | 27.4 |  | **78.6** | **R3_T199A** |
| G5 | 27.8 |  | 7.5 |  | 44.6 |  |
| G6 | 25.9 |  | 17.4 |  | 34.9 |  |
| G7 | 19.3 |  | 23.8 |  | 28.4 |  |
| G8 | 40.7 |  | 11.1 |  | 28.9 |  |
| G9 | 16.9 |  | 21.1 |  | 30.4 |  |
| G10 | **71.6** | **R3_Q92P** | 19.8 |  | 13.8 |  |
| G11 | 6.3 |  | 22.4 |  | 8.3 |  |
| G12 | 20.6 |  | 30.5 |  | 6.0 |  |
| H1 | 33.0 |  | 27.7 |  | 16.6 |  |
| H2 | 11.7 |  | 38.4 |  | 14.6 |  |
| H3 | 18.2 |  | 37.4 |  | 3.9 |  |
| H4 | 20.5 |  | 21.1 |  | 30.4 |  |
| H5 | 25.0 |  | 1.0 |  | 35.3 |  |
| H6 | 7.9 |  | 27.7 |  | 36.9 |  |
| H7 | 36.2 |  | 20.6 |  | 50.4 |  |
| H8 | 28.0 |  | 1.1 |  | 30.7 |  |
| H9 | 25.2 |  | 37.4 |  | 22.8 |  |

### Table S16 Numerical summary of Figure S7b–c–d. Activity of the Ru1·hCAIICSD variants in the production of Cy6. The reactions were performed in triplicate and the standard deviations are displayed.

| **Ru1·hCAIICSD variant (whole-cell)** | **Yield of Cy6 (mg·L-1)** |
| --- | --- |
| WT  R58A  E69A  E69V  E69F  E69I  E69L  D72L  R58A/E69A  R58A/E69A/D72L  R58A/E69A/D72F  R58A/E69A/D72L/Q92P  R58A/E69A/D72L/T199P  R58A/E69A/D72L/T199H  R58A/E69A/D72L/Q92P/T199P | 13.7 ± 1.3  19.2 ± 3.1  24.2 ± 4.4  22.3 ± 7.5  20.0 ± 6.1  22.0 ± 0.8  21.9 ± 0.4  18.3 ± 2.1  30.3 ± 12.7  28.2 ± 5.1  38.7 ± 5.4  44.9 ± 4.9  43.7 ± 5.7  41.8 ± 4.9  50.3 ± 4.5 |

### Table S17 Numerical summary of Figure S10b. Activity of the UndB alanine-substituted variants in the production of 1,7-octadiene. The reactions were performed in triplicate and the standard deviations are displayed.

| **UndB variant (in whole-cell)** | **Yield of 1,7-octadiene (mg·L-1)** |
| --- | --- |
| WT  I89A  M92A  R121A  L126A  S132A  D137A  E139A  E140A  S254A  M257A  Q271A/T272A  F290A  V301A  R308A | 18.0 ± 2.4  34.2 ± 3.2  16.9 ± 2.9  1.4 ± 0.6  16.4 ± 3.5  0.9 ± 0.3  1.6 ± 0.6  0.8 ± 0.2  0.8 ± 0.1  12.5 ± 0.4  24.5 ± 2.4  10.3 ± 2.8  2.2 ± 0.7  9.8 ± 3.2  5.0 ± 2.1 |

### Table S18 Numerical summary of Figure S11. Activity of the UndB variants (from SSM libraries and recombination) in the production of 1,7-octadiene. In general, the reactions were performed in triplicate and the standard deviations are displayed. For the reactions catalyzed by UndB I89C and I89F, no replicate was performed.

| **UndB variant (in whole-cell)** | **Yield of 1,7-octadiene (mg·L-1)** |
| --- | --- |
| WT  I89G  I89A  I89C  I89F  I89L  I89V  I89V/M92R  I89V/L126F  I89V/L126H  I89V/L126W  I89V/M257A  I89V/M257V  I89V/M92R/L126F  I89V/L126F/M257A  I89V/L126F/M257V | 18.4 ± 3.2  23.9 ± 1.7  31.3 ± 4.9  21.5  26.2  25.5 ± 2.4  36.5 ± 1.0  41.1 ± 2.4  57.9 ± 3.8  52.3 ± 9.2  46.8 ± 7.7  43.2 ± 3.3  43.9 ± 4.0  42.8 ± 4.6  51.6 ± 4.5  45.8 ± 5.1 |

### Table S19 Numerical summary of Figure S12. Optimization of 1,7-octadiene production by varying the concentration of the C10 diacid UndB I89V/L126F (in whole-cell). The reactions were performed in triplicate and the standard deviations are displayed.

| **C10 diacid (mM)** | **UndB I89V/L126F cells density (OD600)** | **Yield of 1,7-octadiene (mg·L-1)** |
| --- | --- | --- |
| 1.0  1.5  2.0  3.0  5.0 | 25  25  25  25  25 | 90.2 ± 4.8  132.0 ± 9.4  133.0 ± 11.0  111.7 ± 6.3  63.4 ± 6.5 |
| 2.0  2.0  2.0  2.0 | 12.5  25  50  100 | 86.4 ± 5.1  143.1 ± 3.9  104.6 ± 3.9  9.3 ± 0.7 |

# Appendix

### DNA sequence of UndB WT (GeneBank accession code: MN125554)

ATGAGCCCGAGCCCGGCTTCACTGAATGATCAGCAGCGCGCAGCACATATTCGTGAACAGGTTATGGCCCACGGTAATGCACTGCGTCAGCGTTATCCGATTCTGCAACATCAGGATGCACTGGGCGCCGGCATTCTGGCCTTTGCACTGTGTGGTATGATTGGCAGCGCAGCACTGTATATTGGTGGCCATCTGCCGTGGTGGGCATGTCTGCTGCTGAATGCCTTTTTCGCAAGTCTGACCCATGAACTGGAACATGATCTGATTCATAGCATGTATTTTCGTAAACAGCCGCTGCCGCATAATCTGATGCTGGCACTGGTTTGGCTGGCCCGTCCGAGTACCATTAATCCGTGGGTGCGCCGTCATCTGCATCTGAATCATCATAAAGTGAGCGGTAGTGAAGCCGATATGGAAGAACGCGCCATTACCAATGGCGAACCGTGGGGTATTGCCCGCCTGCTGATGGTTGGCGATAATATGATGAGTAGTTTTATTCGTTGGCTGCGTGCAAAAAATCCGGAACATCGCCGCCTGATTCTGACCCGCACCCTGAAAGTGTATGCACCGCTGGGCCTGCTGAATTGGGCCACCTGGTATTTATTTCTGGGTTTTCATCTGCTGGATTGGGCAGCCGCAGCACTGGGCGCGCCTATTGCATGGAGCGCAAGCACCCTGAGTGTGATGCAGGTGGTGAATGTTGCCGTTGTTGTGCTGGTTGGCCCGAATGTGCTGCGCACCTTTTGTCTGCATTTTGTGAGTAGCAATATGCATTATTACGGCGATGTTGAACCGGGTAATGTGATTCAGCAGACCCAGGTTCTGAATCCGTGGTGGCTGTGGCCGCTGCAAGCATTTTGTTTTAATTTTGGTAGCAGTCATGCAATTCATCATTTTGTGGTTAAAGAACCGTTTTATATCCGCCAGCTGACCGTTCCGTTTGCACATCGTGTTATGCGTGAAATGGGTGTTCGCTTTAATGATTTTGGTACATTTGCCCGTGCCAATCGCTGGACCCGCCGTGCTCGCACCCAGCAAGAACGTGCAAGCACCGCCTAA

### DNA sequence of hCAII WT (GeneBank accession code: KAI4011176.1)

ATGTCCCATCACTGGGGGTACGGCAAACACAACGGACCTGAGCACTGGCATAAGGACTTCCCCATTGCCAAGGGAGAGCGCCAGTCCCCTGTTGACATCGACACTCATACAGCCAAGTATGACCCTTCCCTGAAGCCCCTGTCTGTTTCCTATGATCAAGCAACTTCCCTGAGGATCCTCAACAATGGTCATGCTTTCAACGTGGAGTTTGATGACTCTCAGGACAAAGCAGTGCTCAAGGGAGGACCCCTGGATGGTACCTACAGATTGATTCAGTTTCACTTTCACTGGGGTTCACTTGATGGCCAAGGTTCAGAGCATACTGTGGATAAAAAGAAATATGCTGCAGAACTTCACTTGGTTCACTGGAACACCAAATATGGGGATTTTGGGAAAGCTGTGCAGCAACCTGATGGACTGGCCGTTCTAGGTATTTTTTTGAAGGTTGGCAGCGCTAAACCGGGCCTTCAGAAAGTTGTTGATGTGCTGGATTCCATTAAAACAAAGGGCAAGAGTGCTGACTTCACTAACTTCGATCCTCGTGGCCTCCTTCCTGAATCCCTGGATTACTGGACCTACCCAGGCTCACTGACCACCCCTCCTCTTCTGGAATGTGTGACCTGGATTGTGCTCAAGGAACCCATCAGCGTCAGCAGCGAGCAGGTGTTGAAATTCCGTAAACTTAACTTCAATGGGGAGGGTGAACCCGAAGAACTGATGGTGGACAACTGGCGCCCAGCTCAGCCACTGAAGAACAGGCAAATCAAAGCTTCCTTCAAATAA

### DNA sequence of PelB-INPN-hCAII WT (hCAIICSD). DNA sequences of PelB, INPN, and hCAII WT are labeled in orange, blue, and purple, respectively.

ATGAAATACCTGCTGCCGACCGCTGCTGCTGGTCTGCTGCTCCTCGCTGCCCAGCCGGCGATGGCCATGGCTCTCGACAAGGCGTTGGTGCTGCGTACCTGTGCAAATAACATGGCCGATCACTGCGGCCTTATATGGCCCGCGTCCGGCACGGTGGAATCCAGATACTGGCAGTCAACCAGGCGGCATGAGAATGGTCTGGTCGGTTTACTGTGGGGCGCTGGAACCAGCGCTTTTCTAAGCGTGCATGCCGATGCTCGATGGATTGTCTGTGAAGTTGCCGTTGCAGACATCATCAGTCTGGAAGAGCCGGGAATGGTCAAGTTTCCGCGGGCCGAGGTGGTTCATGTCGGCGACAGGATCAGCGCGTCACACTTCATTTCGGCACGTCAGGCCGACCCTGCGTCAACGTCAACGTCAACGTCAACGTCAACGTTAACGCCAATGCCTACGGCCATACCCACGCCCATGCCTGCGGTAGCAAGTGTCACGTTACCGGTGGCCGAACAGGCCCGTCATGAAGTGTTCGATGTCGCGTCGGTCAGCGCGGCTGCCGCCCCAGTAAACACCCTGCCGGTGACGACGCCGCAGAATTTGCAGACCGCCACTTACGGCAGCACGTTGAGTGGCGACAATCACAGTCGTCTGATTGCCGGTTATGGCAGTAACGAGACCGCTGGCGAAGCATACGGAAGCGCTAGCATGTCCCATCACTGGGGGTACGGCAAACACAACGGACCTGAGCACTGGCATAAGGACTTCCCCATTGCCAAGGGAGAGCGCCAGTCCCCTGTTGACATCGACACTCATACAGCCAAGTATGACCCTTCCCTGAAGCCCCTGTCTGTTTCCTATGATCAAGCAACTTCCCTGAGGATCCTCAACAATGGTCATGCTTTCAACGTGGAGTTTGATGACTCTCAGGACAAAGCAGTGCTCAAGGGAGGACCCCTGGATGGTACCTACAGATTGATTCAGTTTCACTTTCACTGGGGTTCACTTGATGGCCAAGGTTCAGAGCATACTGTGGATAAAAAGAAATATGCTGCAGAACTTCACTTGGTTCACTGGAACACCAAATATGGGGATTTTGGGAAAGCTGTGCAGCAACCTGATGGACTGGCCGTTCTAGGTATTTTTTTGAAGGTTGGCAGCGCTAAACCGGGCCTTCAGAAAGTTGTTGATGTGCTGGATTCCATTAAAACAAAGGGCAAGAGTGCTGACTTCACTAACTTCGATCCTCGTGGCCTCCTTCCTGAATCCCTGGATTACTGGACCTACCCAGGCTCACTGACCACCCCTCCTCTTCTGGAATGTGTGACCTGGATTGTGCTCAAGGAACCCATCAGCGTCAGCAGCGAGCAGGTGTTGAAATTCCGTAAACTTAACTTCAATGGGGAGGGTGAACCCGAAGAACTGATGGTGGACAACTGGCGCCCAGCTCAGCCACTGAAGAACAGGCAAATCAAAGCTTCCTTCAAATAA

# Code availability

The source code for RedLibs v1.1.0, algorithm is available at GitHub: https://github.com/dgerngross/RedLibs. The code used in uASPIre/SAPIENs-based RBS predictions are available under: https://github.com/JeschekLab/uASPIre and https://github.com/BorgwardtLab/SAPIENs.

# References

1. Rebelein, J. G.; Cotelle, Y.; Garabedian, B.; Ward, T. R., Chemical Optimization of Whole-Cell Transfer Hydrogenation Using Carbonic Anhydrase as Host Protein. *ACS Catal.* **2019,** *9* (5), 4173-4178.

2. Zhao, J. M.; Kajetanowicz, A.; Ward, T. R., Carbonic anhydrase II as host protein for the creation of a biocompatible artificial metathesase. *Org. Biomol. Chem.* **2015,** *13* (20), 5652-5655.

3. Jeschek, M.; Reuter, R.; Heinisch, T.; Trindler, C.; Klehr, J.; Panke, S.; Ward, T. R., Directed evolution of artificial metalloenzymes for in vivo metathesis. *Nature* **2016,** *537* (7622), 661-665.

4. Wu, S. K.; Zhou, Y.; Gerngross, D.; Jeschek, M.; Ward, T. R., Chemo-enzymatic cascades to produce cycloalkenes from bio-based resources. *Nat. Commun.* **2019,** *10*, 5060.

5. Wang, S. C.; Zamble, D. B., Fluorescence analysis of sulfonamide binding to carbonic anhydrase. *Biochem. Mol. Biol. Edu.* **2006,** *34* (5), 364-368.

6. Darlington, A. P. S.; Kim, J.; Jiménez, J. I.; Bates, D. G., Dynamic allocation of orthogonal ribosomes facilitates uncoupling of co-expressed genes. *Nat. Commun.* **2018,** *9*. 695

7. Hollerer, S.; Papaxanthos, L.; Gumpinger, A. C.; Fischer, K.; Beisel, C.; Borgwardt, K.; Benenson, Y.; Jeschek, M., Large-scale DNA-based phenotypic recording and deep learning enable highly accurate sequence-function mapping. *Nat. Commun.* **2020,** *11* (1), 3551.

8. Jeschek, M.; Gerngross, D.; Panke, S., Rationally reduced libraries for combinatorial pathway optimization minimizing experimental effort. *Nat. Commun.* **2016,** *7*, 11163.

9. Jurrus, E.; Engel, D.; Star, K.; Monson, K.; Brandi, J.; Felberg, L. E.; Brookes, D. H.; Wilson, L.; Chen, J. H.; Liles, K.; Chun, M. J.; Li, P.; Gohara, D. W.; Dolinsky, T.; Konecny, R.; Koes, D. R.; Nielsen, J. E.; Head-Gordon, T.; Geng, W. H.; Krasny, R.; Wei, G. W.; Holst, M. J.; McCammon, J. A.; Baker, N. A., Improvements to the APBS biomolecular solvation software suite. *Protein. Sci.* **2018,** *27* (1), 112-128.

10. Frisch, M. J.; Trucks, G. W.; Schlegel, H. B.; Scuseria, G. E.; Robb, M. A.; Cheeseman, J. R.; Scalmani, G.; Barone, V.; Petersson, G. A.; Nakatsuji, H.; Li, X.; Caricato, M.; Marenich, A. V.; Bloino, J.; Janesko, B. G.; Gomperts, R.; Mennucci, B.; Hratchian, H. P.; Ortiz, J. V.; Izmaylov, A. F.; Sonnenberg, J. L.; Williams; Ding, F.; Lipparini, F.; Egidi, F.; Goings, J.; Peng, B.; Petrone, A.; Henderson, T.; Ranasinghe, D.; Zakrzewski, V. G.; Gao, J.; Rega, N.; Zheng, G.; Liang, W.; Hada, M.; Ehara, M.; Toyota, K.; Fukuda, R.; Hasegawa, J.; Ishida, M.; Nakajima, T.; Honda, Y.; Kitao, O.; Nakai, H.; Vreven, T.; Throssell, K.; Montgomery Jr., J. A.; Peralta, J. E.; Ogliaro, F.; Bearpark, M. J.; Heyd, J. J.; Brothers, E. N.; Kudin, K. N.; Staroverov, V. N.; Keith, T. A.; Kobayashi, R.; Normand, J.; Raghavachari, K.; Rendell, A. P.; Burant, J. C.; Iyengar, S. S.; Tomasi, J.; Cossi, M.; Millam, J. M.; Klene, M.; Adamo, C.; Cammi, R.; Ochterski, J. W.; Martin, R. L.; Morokuma, K.; Farkas, O.; Foresman, J. B.; Fox, D. J. *Gaussian 16 Rev. C.01*, Wallingford, CT, 2016.

11. Rui, Z.; Harris, N. C.; Zhu, X. J.; Huang, W.; Zhang, W. J., Discovery of a Family of Desaturase-Like Enzymes for 1-Alkene Biosynthesis. *ACS Catal.* **2015,** *5* (12), 7091-7094.

12. Database, A. P. S. Fatty acid desaturase: AlphaFold structure prediction. <https://alphafold.ebi.ac.uk/entry/A4Y0K1>.
